# An ancient route towards salicylic acid and its implications for the perpetual *Trichormus*–*Azolla* symbiosis

Sophie de Vries<sup>1\*</sup>, Cornelia Herrfurth<sup>2,3</sup>, Fay-Wei Li<sup>4,5</sup>, Ivo Feussner<sup>2,3,6</sup>, Jan de Vries<sup>7,8,9</sup>

<sup>1</sup> — Heinrich-Heine University Düsseldorf, Population Genetics, Universitätsstr. 1, 40225 Düsseldorf, Germany

<sup>2</sup> — University of Goettingen, Albrecht-von-Haller-Institute for Plant Sciences, Department of Plant Biochemistry, Justus-von-Liebig Weg 11, 37077 Goettingen, Germany

<sup>3</sup> — University of Goettingen, Goettingen Center for Molecular Biosciences (GZMB), Goettingen Metabolomics and Lipidomics Laboratory, Justus-von-Liebig Weg 11, 37077 Goettingen, Germany

<sup>4</sup> — Boyce Thompson Institute, Ithaca, NY, USA.

<sup>5</sup> — Plant Biology Section, Cornell University, Ithaca, NY, USA

<sup>6</sup> — University of Goettingen, Goettingen Center for Molecular Biosciences (GZMB), Department of Plant Biochemistry, Justus-von-Liebig Weg 11, 37077 Goettingen, Germany

<sup>7</sup> — University of Goettingen, Institute for Microbiology and Genetics, Department of Applied Bioinformatics, Goldschmidtstr. 1, 37077 Goettingen, Germany

<sup>8</sup> — University of Goettingen, Goettingen Center for Molecular Biosciences (GZMB), Department of Applied Bioinformatics, Goldschmidtstr. 1, 37077 Goettingen, Germany

<sup>9</sup> — University of Goettingen, Campus Institute Data Science (CIDAS), Goldschmidtstr. 1, 37077 Goettingen, Germany

\*Corresponding authors:

Sophie de Vries: rommels@hhu.de

Jan de Vries: devries.jan@uni-goettingen.de

## ABSTRACT

Despite its small size, the water fern *Azolla* is a giant among plant symbioses. Within each of its leaflets, a specialized leaf cavity is home to a population of nitrogen-fixing cyanobacteria (cyanobionts). While examples of nitrogen fixing cyanobionts are found across the land plant tree of life, *Azolla* is unique in that its symbiosis is perpetual: the cyanobionts are inherited during sexual and vegetative propagation of the fern. What underpins the communication between the two partners? In angiosperms, the phytohormone salicylic acid (SA) is a well-known regulator of plant–microbe interactions. Using HPLC-MS/MS, we pinpoint the presence of SA in the fern; using comparative genomics and phylogenetics, we mined homologs of SA biosynthesis genes across Chloroplastida (Viridiplantae). While canonical isochorismate synthase (ICS) sequences are largely limited to angiosperms, homologs for the entire Phenylalanine ammonia-lyase (PAL)-dependent pathway likely existed in the last common ancestor of land plants. Indeed, *A. filiculoides* secondarily lost its ICS, but has the genetic competence to derive SA from benzoic acid. Global gene expression data from cyanobiont-containing and -free *A. filiculoides* unveil a putative feedback loop: SA appears to induce cyanobacterial proliferation, which in turn down-regulates genes in SA biosynthesis and its responses.

41

## 42 INTRODUCTION

43

44 The water fern *Azolla filiculoides* is best-known for its unique symbiosis with a nitrogen-fixing  
 45 cyanobacteria, hereafter referred to as the cyanobionts (Rai et al., 2000). Unlike any other  
 46 nitrogen-fixing symbiosis, the one of *Azolla* and its cyanobiont is vertically inherited from  
 47 generation to generation (Peters and Meeks 1989, Zheng et al. 2009a, de Vries and de  
 48 Vries 2018). Indeed, the cyanobiont cannot live without its host (Peters and Meeks 1989,  
 49 Zheng et al. 2009b). This dependency is written in its genome, too (Ran et al. 2010): the  
 50 genome has undergone a strong reduction and erosion. On the other side, when well-  
 51 supplied with nitrogen nutrients *Azolla* is—in the lab—capable of living without its  
 52 cyanobionts (Shi and Hall 1988). Yet, in nature the two partners occur together.

53

54 The *Azolla* cyanobiont is a section IV (Rippka et al. 1979), filamentous nitrogen-fixing  
 55 cyanobacterium; taxonomically it is most commonly assigned to the genus *Anabaena* or  
 56 *Nostoc*—but this affiliation is still debated (Pereira & Vasconcelos 2014; de Vries and de  
 57 Vries 2018). As of late it is called *Trichormus azollae* (Pereira & Vasconcelos 2014). The  
 58 cyanobiont lives in the leaf cavities of *Azolla* species (Peters and Meeks 1989) and co-  
 59 occurs with several other bacterial associates, some which are denitrifiers, likely benefitting  
 60 from the cyanobiont (Dijkhuizen et al. 2018). Additionally, some of the co-occurring bacteria  
 61 appear to be inherited together with the cyanobiont (Zheng et al. 2009b).

62

63 The life cycle of *Azolla* is intertwined with that of its cyanobiont (Rai et al. 2000; Zheng et al.  
 64 2009a; de Vries and de Vries, 2018). During vegetative propagation (i.e. simple growth of  
 65 the fern body and break-up into clonal “colonies”), cyanobiont populations are transferred to  
 66 new leaf cavities via specialized trichomes (Calvert et al. 1985; Hill 1989). The trichomes  
 67 grow out of the newly forming leaf cavities and get associated to the shoot apical meristem  
 68 (Calvert and Peters 1981, Zheng et al. 2009b). On the apical meristem is a colony of  
 69 hormogonia-like filaments of the cyanobiont (Peters et al. 1978, Peters and Meeks 1989);  
 70 these filaments become attached to the branched trichome and as the leaf grows, both the  
 71 trichome and the cyanobiont filaments are engulfed by the formed leaf cavity (Peters and  
 72 Meeks 1989, Zheng et al. 2009a). Whether the other bacteria are transferred by the same  
 73 means and whether as a result each leaf cavity is equipped with a highly similar microbiome  
 74 is currently not known. During sexual propagation, the cyanobionts are attracted to the  
 75 developing sporocarps, where they, similar to the vegetative propagation, become entangled  
 76 in trichomes (Becking, 1987; Perkins and Peters 1993). While the formation of the indusium  
 77 cell layer around the spores occurs, the cyanobionts are moved upwards to the tips of the

sporocarps, where they enter through the indusium pore into the forming indusium chamber (Perkins and Peters 1993). Upon maturation of the sporocarp, the cyanobionts in this chamber turn into resilient akinetes, facilitating the co-dormancy of symbiont and host (Perkins and Peters 1993, Zheng et al. 2009b). Hence, the process of sporocarp maturation and cyanobiont differentiation appears to be tightly coordinated (Zheng et al. 2009b). The molecular mechanisms that underpin this coordination are however unknown.

Vegetative propagation has been studied with regard to its chemical set-up. It appears that especially the trichomes are rich in phenolic compounds (Pereira & Carrapiço 2007). And it has been hypothesized that these phenolics may be relevant in some way for the transfer of cyanobionts from one cavity to another (Pereira & Carrapiço 2007). Indeed, it has been highlighted that the expression of a *chalcone synthase* (*CHS*) homolog of *A. filiculoides* is both responding to the absence of nitrogen and the absence of cyanobionts from the leaf pockets (Li et al. 2018, Eily et al. 2019). A recent study identified homologous genes encoding enzymes of the flavonoid biosynthesis pathway and functionally characterized a key enzyme, leucoanthocyanidin reductase (LAR) (Güngör et al. 2021). The identified homologs of the flavonoid biosynthetic genes (homologs of *chalcone isomerase* (*CHI*), *CHS* and *dihydroflavonol 4-reductase* (*DFR*) and *AfLAR*) appear co-expressed during the diurnal cycle of *A. filiculoides* independent of the nitrogen supply (Güngör et al. 2021). However, without nitrogen the genes rapidly decrease in expression level during the night cycle (Güngör et al. 2021).

Among the flavonoids that have been identified in *A. filiculoides* and also another water fern, *Azolla pinnata*, are derivatives of Caffeoylquinic acid, Dicafeoylquinic (Epi-)Catechin, Quercitin and Kaempferol (Güngör et al. 2021). These flavonoids are involved in defense responses in other plants, e.g. the gymnosperms *Picea abies* (Danielsson et al. 2011). Similarly, another phenolic compound involved in plant defense, salicylic acid (SA) (Ding and Ding 2020), has also been implicated in altering the abundance of the cyanobionts and its expression of genes involved in nitrogen fixation (de Vries et al. 2018). This may suggest that a link between this highly coordinated symbiosis and the defense capabilities of *Azolla* has evolved in the 66-100mya old association (Hall and Swanson 1968, Collinson 2002; Carrapiço 2006).

SA can be synthesized via two distinct routes in land plants: In *Arabidopsis thaliana* the majority of SA stems from conversion of chorismate into isochorismate by isochorismate synthase (ICS) (Wildermuth et al. 2001, Garcion et al. 2008). Isochorismate is transferred from the chloroplast to the cytoplasm and as a substrate of *avrPphB* SUSCEPTIBLE3

(PBS3) conjugated with glutamate, resulting in the product isochorismate-9-glutamate (Rekhter et al. 2019). A spontaneous reaction, which can be also catalysed by ENHANCED PSEUDOMONAS SUSCEPTIBILITY 1 (EPS1), results in the conversion of isochorismate-9-glutamate to SA (Rekhter et al. 2019, Torrens-Spence et al. 2019). Yet, *EPS1* appears to be specific to Brassicaceae and a clear *PBS3* ortholog has not been identified in *A. filiculoides* (de Vries et al. 2018, Torrens-Spence et al. 2019, Li et al. 2020).

Already in other angiosperms than *A. thaliana*, SA may not come from the ICS-dependent pathway but rather derives from benzoic acid (Meulwy et al. 1995, Pallas et al. 1996, Coquoz et al. 1998). These early publications suggested that SA is synthesized via a Phenylalanine Ammonia Lyase (PAL)-dependent pathway from phenylalanine. Phenylalanine is converted into *trans*-cinnamic acid (Widhalm and Dudareva 2015). From here, SA can be synthesized via peroxisomal  $\beta$ -oxidation or two cytoplasm-localized non-oxidative pathways, one CoA-dependent and one CoA-independent (Widhalm and Dudareva 2015). None of the pathways has so far full enzymatic evidence. Yet, some steps along the way have been functionally characterized. Some first importers of phenylpropanoid pathway-derived compounds into the peroxisome have been identified (Block et al., 2014). In the oxidative peroxisomal pathway, *trans*-cinnamic acid is converted into cinnamoyl-CoA (if the latter is not imported) via *trans*-cinnamic acid ligase (*Ph*-CNL) from *Petunia hybrida* and possibly also by its ortholog BENZOYLOXYGLUCOSINOLATE 1 (BZO1) in *A. thaliana* (Colquhoun et al. 2012, Klempien et al. 2012, Lee et al. 2012). In *P. hybrida* the following steps towards benzoyl-CoA are catalyzed via chalcone dehydrogenase (*Ph*CHD) and katalase1 (*Ph*KAT1) (Van Moerkercke et al. 2009, Qualley et al. 2012). In *A. thaliana* they are suggested to be realized by the multifunctional  $\beta$ -oxidation enzyme abnormal inflorescence meristem1 (*At*AIM1) and *At*KAT2 (Bussell et al. 2014, Widhalm and Dudareva 2015). The resulting benzoyl-CoA is converted to benzoic acid by a thioesterase, likely 1,4-dihydroxy-2-naphthoyl (DHNA)-CoA THIOESTERASE 1 (*At*DHNAT1/2) in *A. thaliana* (Widhalm et al. 2012, Widhalm and Dudareva 2015) or *Ph*-TE1 in *P. hybrida* (Adebesin et al. 2018). In the non-oxidative cytoplasmic pathways, a hydratase is suggested to use *trans*-cinnamic acid or cinnamoyl-CoA as a substrate and hydrates the double bond to form 3-hydroxy-3-phenylpropionic acid or 3-hydroxy-3-phenylpropanoyl-CoA, respectively (see Widhalm and Dudareva, 2015). Both of which are likely converted into benzaldehyde by a lyase-dependent reaction (see Widhalm and Dudareva, 2015). In *A. thaliana* benzaldehyde is converted to benzoic acid by Arabidopsis Aldehyde Oxidase4 (AAO4) (Ibdah et al. 2009), while in Snapdragon (*Antirrhinum majus*) it is imported into the mitochondrion and converted to benzoic acid by benzaldehyde dehydrogenase (BALDH) (Long et al. 2009). Independent

of the route benzoic acid is produced, it was suggested that benzoic acid 2-hydroxylase (BA2H)-like enzyme catalyzes the last step from there to SA (León et al. 1995).

In this study we explore the connections between SA and the coordinated symbiosis of the water fern *A. filiculoides* and its cyanobiont *T. azollae*. Using HPLC-MS/MS we measured SA in roots and the photosynthesizing sporophyte body of *A. filiculoides*. Because it is not known by which pathway the symbiotic system synthesizes SA, we used the cumulated knowledge on enzymatic synthesis of SA of the green lineage to identify candidate genes for SA biosynthesis in *A. filiculoides*. Applying comparative genomics and phylogenetics, we searched for orthologs—and the closest homologs—of key genes likely acting in the ICS- and PAL-dependent pathway; we further explored the possibility of cyanobiont-derived SA. We find that only the genomes of *Chara braunii*, *Selaginella moellendorffii* and angiosperms encode a separate standalone ICS. All other chlorophyte and streptophyte algae as well as bryophytes and the fern *Salvinia cucullata* contain a fusion enzyme, where the ICS domain is fused with a MenC and/or MenD domain, suggesting that chorismate can be quickly diverted into the phyloquinone pathway. Moreover, *A. filiculoides* entirely lacks an ICS-encoding gene. In contrast, our phylogenetic data support the presence of homologs for all known steps in the PAL-dependent pathway across land plants, suggesting that the benzoic acid pathway has the potential to be recruited for SA biosynthesis in several land plant lineages. Our data pinpoint the biosynthetic routes of SA via benzoic acid as the most likely origin of SA in *A. filiculoides*. We carried out global gene expression analyses on the PAL-dependent SA biosynthesis pathway and homologs to SA responsive genes. The majority of SA-associated genes that showed differential gene expression patterns appear to be down-regulated in the presence of the cyanobionts. Integrating this with previous results, we hypothesize that a feedback loop has co-evolved between the two partners, that tightly coordinates the levels of SA with the proliferation of the cyanobionts.

## MATERIAL AND METHODS

### Measurement of SA levels

The water fern *Azolla filiculoides* was cultured at 75% relative humidity in a heat-sterilized glass vessel. The ferns floated on 250 mL filtered water with a pH of 7.0. During the 16h-long day, the fern was exposed to 450  $\mu\text{mol quanta m}^{-2} \text{s}^{-1}$  at 24 °C; during the 8h-long night, the temperature dropped to 20 °C. We picked plants from actively growing culture and used sterilized micro-scissors to separate the fern body into whole roots and green sporophyte tissue (i.e. with roots removed). Extraction was performed as previously described for lipids (Matyash et al., 2008), with some modifications specified previously (Iven et al., 2012). The

analysis was performed using an Agilent 1100 HPLC system (Agilent, Waldbronn, Germany) coupled to an Applied Biosystems 3200 hybrid triple quadrupole/linear ion trap mass spectrometer (MDS Sciex, Ontario, Canada) by using an ESI chip ion source (TriVersa NanoMate; Advion BioSciences, Ithaca, NY, USA). The quantification of SA was performed as previously described (Iven et al., 2012) applying a scheduled multiple reaction monitoring detection in negative ionisation mode including the following MS transitions: 141/97 [declustering potential (DP) -45 V, entrance potential (EP) -7 V, collision energy (CE) -22 V] for D<sub>4</sub>-SA and 137/93 (DP -45 V, EP -7 V, CE -22 V) for SA. The quantification was carried out using a calibration curve of intensity (*m/z*) ratios of [SA]/[D<sub>4</sub>-SA] vs. molar amounts of SA (0.3-1000 pmol).

Statistical analyses have been performed in R v.3.6.0. Data was tested for normality using a Shapiro-Wilks test (Shapiro and Wilk, 1965), following a test to compare the variance of the data between replicates of SA measurements from roots and sporophytes of *A. filiculoides*. The data was normally distributed and showed no significant difference in variance. Accordingly, a two-sample t-test (Student 1908) was computed.

# **Identification and phylogenetic analyses of SA biosynthesis genes of *A. filiculoides***

For phylogenetic analyses, we worked with protein data from the genomes of *Anthoceros agrestis* as well as *Anthoceros punctatus* (Li et al., 2020), *Amborella trichopoda* (Amborella Genome Project, 2013), *Arabidopsis thaliana* (Lamesch et al., 2011), *Azolla filiculoides* (Li et al., 2018), *Brachypodium distachyon* (The International Brachypodium Initiative, 2010), *Capsella grandiflora* (Slotte et al., 2013), *Gnetum montanum* (Wan et al., 2018), *Marchantia polymorpha* (Bowman et al., 2017), *Nicotiana tabacum* (Sierro et al., 2014), *Oryza sativa* (Ouyang et al., 2007), *Picea abies* (Nystedt et al., 2013), *Physcomitrium patens* (Lang et al., 2018), *Salvinia cucullata* (Li et al., 2018), *Selaginella moellendorffii* (Banks et al., 2011), and *Theobroma cacao* (Argout et al., 2011); (b) the genomes of seven streptophyte algae: *Chlorokybus atmophyticus* (Wang et al., 2020), *Chara braunii* (Nishiyama et al., 2018), *Klebsormidium nitens* (Hori et al., 2014), *Mesotaenium endlicherianum* (Cheng et al., 2019), *Mesostigma viride* (Wang et al., 2020), *Penium margaritaceum* (Jiao et al., 2020), *Spirogloea muscicola* (Cheng et al., 2019). For each of the protein families, specific cutoffs were chosen (see below). All sequences that have met the respective cutoffs, were aligned using MAFFT v7.453 (Kato and Standley, 2013) with the setting L-INS-I. Alignments were cropped to conserved and alignable regions for all homologs. Maximum likelihood phylogenies were computed using IQ-TREE multicore v.1.5.5 (Nguyen et al., 2015) with 100



bootstrap replicates. For finding the best model of protein evolution, we used ModelFinder (Kalyaanamoorthy et al., 2017). The best models were LG+G4 (Le and Gascuel, 2008) for PAL, LG+I+G4 for AIM1, KAT, LG+F+I+G4 for AAO, JTT+I+G4 (Jones et al., 1992) for DHNAT.

Protein sequences for enzymes involved in PAL-dependent biosynthesis of SA in *A. thaliana*, *P. hybrida* or Snapdragon (*Antirrhinum majus*) have been downloaded from TAIR (Lamesch et al., 2011), NCBI, and UniProt. Sequences have sampled by using an HMM search via HMMER 3.1b2 (Mistry et al., 2013) with the ammonia lyase domain (obtained from PFAM) as a query against the proteins from the above-described genomes; all sequences that met the inclusion threshold were retained. Additionally, HAL and fungal PAL sequences that were included in de Vries et al. (2017) were added. For computing the maximum likelihood phylogeny, we used only those sequences that were at least 600 amino acids in length.

For identification of putative ICS sequences in *A. filiculoides*, we conducted an HMM search using HMMER 3.1b2 (Mistry et al., 2013) for the chorismate binding domain against the high- and low-confidence protein sequences from the *A. filiculoides* genome v.1.1 (Li et al., 2018). We used all three thusly identified *Azolla* sequences that met the HMM search inclusion threshold (e values of  $4.8 \times 10^{-87}$ ,  $4.6 \times 10^{-85}$ , and  $3.7 \times 10^{-84}$ ) as queries for a BLASTp search against the protein dataset from the above described genomes. To improve the sampling on the closest algal relatives of land plants, we additionally included sequences found via a tBLASTn in the transcriptomes of *Spirogyra pratensis* (de Vries et al., 2020), *Zygnema circumcarinatum* (de Vries et al., 2018), and *Coleochaete orbicularis* (Ju et al., 2015). We used only those sequences that have met an e value cutoff of  $10^{-10}$ , had a minimum length of 300 amino acids.

### Identification of SA biosynthesis genes in cyanobacteria

To identify the ICS of *T. azollae* we downloaded the ICS sequence of *Trichormus variabilis* from NCBI and used it in a BLASTp query against *T. azollae* in the non-redundant protein (nr) database of NCBI. To identify chorismate binding enzymes we blasted ICS, anthranilate synthase and aminodeoxychorismate synthase of *T. azollae* against cyanobacteria in the nr database. Further, we downloaded sequences for isochorismate pyruvate-lyase (IPL) from *Pseudomonas aeruginosa* (accession NP\_252920.1) and salicylate synthase (SAS) of *Mycobacterium tuberculosis* (accession YP\_177877.1). We used these sequences to identify IPL and SAS enzymes in cyanobacteria using BLASTp at NCBI.

## Identification of homologs to SA responsive genes

We downloaded all protein sequences from TAIR10 (Lamesch et al. 2011) linked to the term response to SA. This resulted in 176 sequences, which we used as a query in a blastp search against the proteome of *A. filiculoides* (Li et al. 2018). The 16,776 non-unique hits were funneled into a reciprocal BLASTp search with max\_target\_seqs 1, returning the best hits from *A. thaliana* for 3,386 unique *A. filiculoides* proteins. We next retained only those sequences that had their best hit to one of the 176 accessions of *A. thaliana* associated with the term response to SA and used an e-value cutoff of  $10^{-7}$ . The *A. filiculoides* sequences corresponding to the final list of hits against *A. thaliana* were considered homologs to SA responsive genes; and after removal of low-confidence proteins added up to 97 candidates.

## Analyses of conserved sites in chorismate binding enzymes

Protein sequences of the chorismate binding enzymes of plants were separated into ICS, anthranilate synthase and aminodeoxychorismate synthase sequences according to the phylogenetic analysis. Further protein sequences of the top 100 blastp hits for each type of the cyanobacterial chorismate binding enzymes were downloaded from NCBI. Each subset of protein sequences was aligned with that of the anthranilate synthase of *Salmonella enterica* subsp. *enterica* serovar Typhimurium str. LT2 with MAFFT using a L-INS-I approach (Kato and Standley, 2013) to identify the conserved positions described in Plach et al. (2015). To generate sequence logos for the respective groups the sequence from *Salmonella* was removed from the alignment after the positions were located. Sequence logos were generated based on the alignments.

## Transcriptomic profiling of candidate genes for SA biosynthesis and signaling

Raw read count data for *A. filiculoides* with or without cyanobiont and treated with or without fixed nitrogen ( $\text{NH}_4\text{NO}_3$ ) supply were obtained from Eily et al. (2019). We calculated the TPM for all datasets according to (Robinson and Oshlack, 2010) and used edgeR (Robinson et al., 2010) to calculate  $\log_2$ -foldchange and to identify the differently expressed genes (DEGs) within a given dataset. To calculate FDR from p-values a Benjamini-Hochberg correction was used.

## Protein domain search

We used Interpro (Blum et al., 2020) to identify protein domains in chorismate binding enzymes of land plants and used the information of TIGR to identify the putative function of the chorismate binding enzymes identified in our BLASTp and phylogenetic analyses. Likewise, we used CD search (Marchler-Bauer et al., 2004) and the information of TIGR IDs



for protein domain analyses of cyanobacterial protein domains of chorismate binding enzymes.

## RESULTS AND DISCUSSION

### ***Azolla filiculoides* produces SA**

Molecular data on cross-talk and co-ordination between *Azolla* and its cyanobionts are just becoming more and more abundant (Brouwer et al. 2017, de Vries et al. 2018, Li et al. 2018, Eily et al. 2019, Güngör et al. 2020). Several studies point to a role of flavonoids in the communication between the two partners (Pereira and Carrapiço 2007, Güngör et al. 2020) and MeSA, a methylated, volatile derivative of SA, appears to also interfere in the interaction (de Vries et al. 2018). Yet, we do not know whether and how SA is synthesized endogenously in *A. filiculoides*.

In a first step, we measured endogenous SA levels in the roots and sporophyte of *A. filiculoides* (Table 1). The data confirmed that *A. filiculoides* harbors SA. Roots appear to harbor slightly more SA than the sporophyte (roots:  $0.18 \pm 0.03$  nmol/g fresh weight (FW), sporophyte:  $0.09 \pm 0.02$  nmol/g FW,  $p\text{-value}=0.0337$ ). Yet, these basal levels of SA in the non-axenic *Azolla* are relatively low compared to for example Col-0 from *A. thaliana* (Rekhter et al. 2019). Regardless of how much SA was measured, the mere fact that it is present in the fern body begs the question of how it is synthesized. We thus next used the recently released genomic data on *Azolla filiculoides* to explore possible biosynthetic routes towards SA.

### **A treatise of the three possible routes for SA biosynthesis in *A. filiculoides***

Land plants have two biosynthetic routes towards SA. One route depends on ICS, the other on PAL (Vlot et al. 2009). Unlike other land plants, *Azolla* theoretically has a third option to acquire SA via the biochemical capacities of its omnipresent cyanobiont. Here we used a phylogenetic approach utilizing the genome data of *A. filiculoides* and a diversity of genomes from other species from the green lineage to identify putative candidates for the SA biosynthesis pathways in *Azolla*. We further investigated the cyanobiont genome with regard to its theoretical ability to synthesize the hormone.

#### *The ICS-dependent pathway*

The ICS-pathway is localized in the plastid and cytoplasm and requires ICS1 and 2 and PBS3 (Wildermuth et al. 2001, Garcion et al. 2008, Rekhter et al. 2019). The last step in the

conversion to SA can either be spontaneous or catalyzed by EPS1 (Rekhter et al. 2019, Torrens-Spence et al. 2019). EPS1 is Brassicaceae-specific (Torrens-Spence et al. 2019), but it is also not strictly required for the interaction. PBS3 has emerged from a lineage-specific expansion of GH3-encoding genes (de Vries et al. 2018, Li et al. 2020). However, two GH3-homologs exist in the *A. filiculoides* genome that fall into the same GH3 clade as AtPBS3 (Li et al. 2018, Li et al. 2020 supplemental material). For the key enzyme, ICS, BLASTp surveys identified only a single low-confidence sequence in *A. filiculoides* (Li et al. 2018, 2020), which appears rather divergent to other ICS1 candidates as shown in the (supplemental) phylogenetic analyses included in Li et al. (2020). Here, we investigated the chorismate binding protein families in more detail.

Using an HMMsearch against the genome of *A. filiculoides*, we found three protein-coding genes (*Azfi\_s0185.g056617*, *Azfi\_s0002.g007267*, and *Azfi\_s0061.g034905*) with a chorismate-binding domain (for which we obtained an HMM profile from PFAM; El-Gebali et al., 2019). ICS sequences exist throughout the green lineage, but we found no ortholog for *A. filiculoides* (Figure 1a). The existence of an ICS sequence in land plants and algae suggests that the last common ancestor of the Chloroplastida had an ICS sequence. The lack of an ICS in *A. filiculoides* can only be explained by a secondary loss; this absence is corroborated by the lack of clear ICS orthologs in the transcriptome data of *Azolla carolinia* (sequenced in the framework of the 1KP efforts; Carpenter et al., 2019) and *Azolla pinnata* (Shen et al., 2018; see supplemental Figure S1).

Whether the isochorismate pathway is used in all species with an ICS ortholog is however unclear when we investigated the protein domain structures of all ICS sequences. The ICS candidates from bryophytes, algae and the fern *S. cucullata* appear to be compound enzymes coupled with a MenC and/or MenD domain (Figure 1a). This suggests that in these species ICS may directly funnel isochorismate into the menaquinone pathway rather than into a route towards SA. Yet, in some of the species, such as the moss *Physcomitrium patens*, SA has been detected (Ponce De León et al., 2012). Thus, ICS was either recruited later in the evolution of land plants as the primary route towards SA or it is species specific whether SA derives from isochorismate or benzoic acid in plants. However, ICS may not be the only source for isochorismate.

Usually anthranilate synthases convert chorismate to aminodeoxyisochorismate and then to anthranilate. That said, a *Salmonella* anthranilate synthase was successfully engineered to become an isochorismate-forming enzyme by exchanging two amino acids in the active center (Plach et al. 2015). A mutation leading to a lysine at position 263 instead of glutamine

and another either at 364 changing a methionine to a lysine or at 365 changing lysine to valine led to isochorismate formation in *Salmonella* (Plach et al. 2015). These residues are more or less conserved across different phyla in bacteria (Plach et al. 2015): with Q263 and M364 being conserved across all analyzed anthranilate and aminodeoxychorismate synthases and L365 in the anthranilate synthases and I365 in the aminodeoxychorismate synthases. ICS and salicylate synthase (SAS) show a conserved K263, but appeared to be slightly more variable at positions 364 (ICS major amino acid (aa): 364L; SAS major aa: 364I) and position 365 (ICS major aa: 365V; SAS major aa: 365S). Further, the 263 lysine (K190 in *Escherichia coli*) was shown to be highly relevant for the function of bacterial ICS (Kolappan et al. 2007). We found that all land plant lineages included in this phylogeny, including *A. filiculoides*, also encode putative anthranilate synthases in their genomes (Figure 1a).

To elucidate whether the putative anthranilate synthases of Chloroplastida and of *A. filiculoides* in particular can potentially take over the role of ICS in the fern, we explored the respective positions determining the product specificity (a) in the set of land plant chorismate binding enzymes to establish the most abundant residues in land plants at these functionally relevant positions and (b) in the three *A. filiculoides* protein sequences. The anthranilate synthases of plants had the same aa pattern as bacterial anthranilate synthases: Q, M, and L (Figure 1b), while the aminodeoxychorismate synthases encoded mainly an E at the position equivalent to 263, and M, and I at the respective positions for 364 and 365 (Figure 1b). 263E was the second most abundant residue in aminodeoxychorismate synthases of bacteria (Plach et al. 2015), suggesting that the three residues are in general conserved across prokaryotes and eukaryotes. Plant ICS however showed a K, I and V at the respective positions in the alignment. All three positions were not variable in plant ICS (Figure 1b). This is corroborated by the fact, that the anthranilate synthase from *A. filiculoides* encoded a QML motif as any other land plant. Overall, this suggests that it does not fill in for the function of the missing ICS.

#### *The PAL-dependent pathway*

A PAL-dependent pathway for SA biosynthesis has been suggested for several angiosperms (Meuwly et al. 1995, Pallas et al. 1996, Coquoz et al. 1998). The synthesis of SA via PAL can be facilitated via several different routes of benzoic acid metabolism. All of them have in common that PAL, which converts phenylalanine to *trans*-cinnamic acid, is the entry point for SA synthesis (Widhalm and Dudareva, 2015). The  $\beta$ -oxidation pathway requires enzymes from the 4CL family and the closely related *At*BZO1/*Ph*-CNL clade, the hydratase *Ph*CHD, *Ph*KAT1 and *At*DHNAT1/2 (Van Moerkercke et al., 2009, Colquhoun et al., 2012, Klempien

et al., 2012, Lee et al., 2012, Qualley et al., 2012, Widhalm et al., 2012, Widhalm and Dudareva, 2015). The non-oxidative pathway also requires 4CL, the hydratase AIM1, which is the ortholog of *A. thaliana* to *PhCHD*, a lyase, AAO4 (Ibdah et al., 2009, Bussel et al., 2014, Widhalm and Dudareva, 2015) or in Snapdragon (*Antirrhinum majus*) the benzaldehyde dehydrogenase (BALDH; Long et al. 2009). The last step in the biosynthesis of SA is only indirectly characterized and an inhibitor study suggests that BA2H-like enzyme is required (León et al., 1995).

To identify PAL candidates in *A. filiculoides*, we performed an HMMsearch with the aromatic lyase motif (HMM profile obtained from PFAM; El-Gebali et al., 2019) against the genome of *A. filiculoides* as well as other representative species from across the streptophyte tree of life. The aromatic lyase motif is present in PAL, (P)TAL, TAM and PAL-tRNA synthase fusion proteins of plants. We used this dataset together with a subset of fungal PAL and eukaryotic HAL sequences (selected from the dataset of de Vries et al. 2017) to build a phylogeny.

In our phylogeny the fungal PAL, tRNA-PAL fusion proteins and eukaryotic HAL proteins each form their own clade (Figure 2). Yet, the functionally characterized PTAL and TAM sequences of plants fall into the midst of the putative PAL clade (Figure 2). A detailed study in *Sorghum bicolor* has identified two positions relevant for distinguishing PAL and PTAL (Jun et al. 2018): the presence of Phe at position 123 (relative to the characterized *SbPTAL* Sb04g026510) and Lys at position 443, were present in sequences with PAL activity, while *SbPTALs* showed His and Lys at the two respective positions. In *OsTAM* (Yan et al. 2015) these two positions are occupied by a Tyr and Asn respectively; the same combination of residues occurs in a *S. bicolor* PAL/PTAL candidate (Figure 2) that had neither tyrosine nor phenylalanine activity (Jun et al. 2018). To make more sense of the phylogenetic data, we mapped this sequence information of the two positions to the phylogeny.

While all HAL sequences occupied a 123S and 443M, the tRNA synthesis fusion proteins showed a deletion of both residues. In contrast, most sequences that fall into the plant and fungal PAL clade occupy Lys at position 443 (relative to Sb04g026510), with the exception of one very divergent sequence from *M. polymorpha* (Mapoly0142s0036.1.p; 443H) and the subclade including *OsTAM* (LOC\_Os11g48110.1), which showed Asn at position 443 (Figure 2). Position 123 was more variant among fungal and plant PALs: Most fungal PALs have His at the relevant site, suggesting they may be PTALs instead. In contrast, most plant PAL candidates have a Phe at the site of interest, with the exception of the subclades including the monocot PTALs and TAM candidates and one *A. thaliana* PAL sequence

(123Y in *AtPAL3*; Figure 2). In agreement, *AtPAL3* was found to have the lowest catalytic activity as phenylalanine ammonia lyase of all four PALs of *A. thaliana* (Cochrane et al. 2004). All seven included sequences of *A. filiculoides*, that were full-length and high-confidence sequences, showed a 123F and 443K (Figure 2), suggesting them as likely PAL candidates.

Next, we investigated the acyl-activating enzyme (AAE) family that includes *Ph*-CNL and its co-ortholog *AtBZO1* (Figure S2), and all *At4CLs*. Our analysis captured sequences from five of the seven predicted subfamilies of AAEs (Shockey et al., 2003). In general, we recovered four of the AAE subfamilies with a bootstrap support of at least 75. The family shows various lineage-specific expansions (Figure S2). Only AAE clade VII did not form a monophyletic clade (Figure S2). Clade I, IV, V and VI appear to have their origin in the last common ancestor of land plants, yet especially clade IV to VI show substantial lineage-specific radiation. Our enzymes of interest belong to these highly expanded clades: *AtBZO1* and *Ph*-CNL belong to AAE clade VI, and 4CL1,2,3 and 5 belong to AAE clade IV (Figure S2, Shockey et al., 2003). Despite that, we found four clear homologs of *A. filiculoides* for the 4CL-encoding genes (*Azfi\_s0003.g007625*, *Azfi\_s0013.g013344*, *Azfi\_s0114.g046013* and *Azfi\_s0030.g024259*) and two candidates for AAE clade VI (*BZO1/Ph*-CNL; *Azfi\_s0159.g053935* and *Azfi\_s0002.g003721* [low-confidence sequence]). The next steps in the oxidative and non-oxidative pathways are catalyzed by hydratases *Ph*CHD in *P. hybrida* and likely by its ortholog *AtAIM1* in *A. thaliana* (Qualley et al. 2012, Bussell et al. 2014). Our phylogeny shows that an AIM1/CHD hydratase was present in the last common ancestor of Chloroplastida. While several lineages have species-specific expansions of the AIM1/CHD family, *A. filiculoides* possesses one clear ortholog for this hydratase (*Azfi\_s0256.g060521*; Figure 3). A similar picture emerges for the next step in the peroxisomal pathway catalyzed by KAT: One KAT homolog was present in the last common ancestor of Chloroplastida, but KAT sequences have expanded in several lineages, most pronounced in the Brassicaceae (Figure 4). In contrast, the two sequenced fern genomes (*S. cucullata* and *A. filiculoides*), however, possess only one copy for KAT (*Azfi\_s0001.g000824*, Figure 4). The final peroxisomal step to benzoic acid is realized by a thioesterase; *AtDHNAT1/2* shows activity on benzoyl-CoA esters (Widhalm et al. 2012) and was hypothesized for this step (Widhalm and Dudareva 2015). The DHNAT family more or less mirrors the species phylogeny, yet includes again species-specific radiations (Figure 5). In the ferns, we find a duplication for DHNAT homologs in *S. cucullata*, but one ortholog in *A. filiculoides* (*Azfi\_s0008.g011631*; Figure 5).

In the non-oxidative pathway, two possible routes towards benzoic acid exist. Both start in the cytoplasm and require a hydratase (which is suggested to occur in both the cytosol and the peroxisomal pathway; and a lyase to synthesize benzaldehyde (Widhalm and Dudareva, 2015). The conversion from benzaldehyde to benzoic acid can occur via two different steps: (i) a cytoplasmic step, catalyzed by AAO4 in *A. thaliana* (Ibdah et al. 2009), or (ii) a mitochondria-localized step, as described for Snapdragon (*Antirrhinum majus*), where BALDH is converting the benzaldehyde to benzoic acid (Long et al. 2009). Given that for the last step towards benzoic acid different routes processed by distinct types of enzymes have been described, we analyzed both of them bioinformatically. Similar to the peroxisomal pathway, BALDH and AAO homologs must have already existed in the common ancestor of all Chloroplastida (Figure 6, S2). While algae contain only one homolog of BALDH, many of the land plant lineages show lineage-specific expansions on BALDH-like homologs (Figure S3). This also includes the fern *A. filiculoides*. In the ALDH2 clade that contains BALDH the fern *S. cucullata* has an ortholog, but not *A. filiculoides* (Figure S3). That said, several sequences of *A. filiculoides* fall into the larger clade of ALDH1 and ALDH2 sequences, where they, however, only cluster with weak support (bootstrap value 61) with the ALDH1 rather than ALDH2 sequences. These are therefore the most likely candidates for a BALDH reaction (Azfi\_s0021.g015740 [low-confidence sequence], Azfi\_s0078.g038198, Azfi\_s0049.g030778 and Azfi\_s0083.g038897; Figure S3). As for the BALDH-like sequences, the AAO family shows lineage-specific radiation. This is most extensive in angiosperms and the lycophyte *S. moellendorffii* (Figure 6). In contrast, the two ferns have each only one copy for AAO (for *A. filiculoides*: Azfi\_s0158.g053886; Figure 6).

The PAL-dependent pathway is less-explored as a source for SA in land plants compared to ICS-dependent synthesis of SA. The PAL-dependent pathway, despite being highly radiated, has homologs for all enzymes being present at least in the last common ancestor of all streptophytes—going hand in hand with the idea that parts of this pathway were part of the genetic building blocks that allowed for the radiation of specialized metabolism in land plants (Fürst-Jansen et al., 2020). This is most likely explained by the fact that this pathway is not a highly specialized pathway for SA biosynthesis, but instead recruits steps from other pathways, such as phenylpropanoid. With regard to the water fern *A. filiculoides*, our data adds more support to benzoic acid-derived SA than isochorismate-derived SA biosynthesis (Figure 7). In this unique system, however, another plausible route for synthesizing SA exists. Cyanobacteria from the Nostocaceae, to which the cyanobiont belongs, can synthesize SA (Toribio et al. 2020) and it is possible that *A. filiculoides* has an alternative reservoir for this phytohormone.



## The cyanobionts' pathway

Instead of producing SA autonomously, it is theoretically conceivable that the cyanobiont produces SA for *A. filiculoides*. We therefore investigated the cyanobionts genome for its genetic capability to synthesize SA. Bacteria produce SA either via ICS and IPL enzymes or directly via salicylate synthase (Ankenbauer and Cox, 1988, Gaille et al., 2002, Zwahlen et al., 2007). Indeed, in several Nostocaceae SA has been measured (Toribio et al. 2020). This leaves the possibility that between *Azolla* and its cyanobiont a tight regulation of SA-derived host responses has co-evolved.

We searched for ICS sequences in *T. azollae* using the ICS sequence from *T. variabilis*; we retrieved three sequences annotated as ICS (WP\_013190659.1; query coverage 97%, % identity 68.63%, e-value 0), anthranilate synthase component I (WP\_013192196.1; query coverage 63%, % identity 27.48%, e-value  $2 \times 10^{-23}$ ) and aminodeoxychorismate synthase component I (WP\_013189914.1; query coverage 71%, % identity 27.54%, e-value  $1 \times 10^{-28}$ ; Figure 8a). Isochorismate is converted to salicylic acid via IPL (Gaille et al., 2002). Therefore, we next searched for an IPL candidate in *T. azollae*. Using the functionally characterized IPL of *Pseudomonas aeruginosa* (Gaille et al., 2002) as a query for a BLASTp, we found no hits in the genome of *T. azollae* but in several other cyanobacteria, including the order Nostocales and the family Nostocaceae, to which *T. azollae* belongs (Figure 8b). Thus, while some *Nostoc* species are able to synthesize SA (Toribio et al. 2020), only three different species from the Nostocaceae encoded an IPL sequence (Figure 8b).

Some bacteria use salicylate synthase, which directly converts chorismate to SA. Therefore, we queried the functionally characterized salicylate synthase from *Mycobacterium tuberculosis* (Zwahlen et al. 2007) in a BLASTp search against (a) *T. azollae* (supplemental data S1A) and (b) all cyanobacteria (supplemental data S1B). In the search against *T. azollae* we retrieved two hits; one against anthranilate synthase component I (e-value  $6 \times 10^{-28}$ ), of which the best hit in a protein domain search was indeed against anthranilate synthase component I (TIGR00564, e-value 0) and one against ICS (e-value  $2 \times 10^{-18}$ ), but no hit to an annotated salicylate synthase. In contrast to the IPL distribution, the most hits of salicylate synthase were in the family of Nostocaceae (Figure 8c). All of the top100 salicylate synthase-like sequence from diverse cyanobacteria, were predicted to contain a salicylate synthase domain (TIGR03494). Yet, all sequences also matched TIGR domain annotations for an ICS domain (TIGR00543), an aminodeoxychorismate synthase component I domain (TIGR00553) and an anthranilate synthase component I domain (TIGR00564). The positions

for all domain annotations were partially overlapping. This is in contrast to the two sequences retrieved for *T. azollae*, which had their best TIGR domain hits to an anthranilate synthase component I (TIGR00564, e-value 0) and ICS domain (TIGR00543, e-value  $4.75 \times 10^{-107}$ ).

As described above engineered anthranilate synthases from *Salmonella* had been described to convert chorismate to isochorismate instead of anthranilate (Plach et al. 2015). Some of these anthranilate synthase mutants even directly synthesized SA from chorismate (Plach et al. 2015). We, thus, had a closer look at the putative chorismate binding enzymes of *T. azollae*. Similar to our analyses for the anthranilate synthase of the host, we aligned the protein sequences of *T. azollae* with that of the anthranilate synthase from *S. enterica* subsp. *enterica* serovar Typhimurium str. LT2. As described for several major phyla of bacteria (Plach et al., 2015), the anthranilate synthases of cyanobacteria had the QML motif, and the cyanobacterial aminodeoxychorismate synthases encoded the expected QMI motif (Figure 8d). Likewise, salicylate synthase and ICS encoded usual motifs with KLS and KLV, respectively (Figure 8d).

Cyanobacterial anthranilate synthase, including that of *T. azollae*, and aminodeoxychorismate synthase have the QML and QMI motif. Hence, they show the typical aa pattern for these types of enzymes (Plach et al. 2015) and are likely not involved in SA biosynthesis. The ICS had a KLV motif, frequently found for bacterial ICS sequences (Plach et al. 2015). This suggests that *T. azollae* is capable of synthesizing isochorismate but not SA. Given that *Trichormus* species have been shown to produce SA (Toribio et al. 2020), it can be envisioned that *T. azollae* lost its salicylate synthase or IPL. Indeed, during the 66-100 million years of co-evolution between fern and cyanobiont (Hall and Swanson 1968, Collinson 2002; Carrapiço 2006), the genome has started to erode, evident by a high proportion of pseudogenes (Ran et al. 2010). It could therefore, be that due to SA being synthesized by *Azolla*, *T. azollae* lost its SA synthesizing capabilities. Isochorismate in bacteria can be funneled into the menaquinone pathway (Daruwala et al. 1996, Meganathan and Kwon 2009) or to produce SA under iron deficiency, possibly to act as a siderophore (Visca et al. 1993). In the here described scenario isochorismate of the cyanobiont would singularly be used for menaquinone biosynthesis, while potential SA-associated siderophores may require SA from *Azolla* to be shuffled to its symbiont. However, isochorismate can decompose at slow rates directly into SA and the existence of an IPL may not be necessary when the other isochorismate-metabolizing route towards menaquinone is not active (Rekhter et al. 2019).

# *PAL-dependent routes appear the most likely path towards SA in Azolla*

All major land plant lineages and green algae appear to encode an ICS sequence in their genomes (Figure 1a). This includes the only other sequenced fern genome of *Salvinia cucullata*—but not that of *A. filiculoides*. This warrants attention. If we rule out simple technical errors, *A. filiculoides* appears to have secondarily lost its ICS sequence and by that its ability to synthesize isochorismate. It is conceivable that during the evolutionary history of plants and algae, SA biosynthesis had already once been recruited from a cyanobiont—the cyanobacterial plastid progenitor (Gross et al., 2006). In the Brassicaceae *A. thaliana* ICS is localized to the plastid, where it synthesizes isochorismate (Wildermuth et al. 2001, Garcion et al. 2008), which is then transferred to the cytoplasm to be further processed into SA (Rekhter et al. 2019). It is thus tempting to speculate that this is a case where the tape of evolution is replayed: the fern *Azolla* receives isochorismate from its symbiont, *T. azollae*, and uses this backbone molecule to synthesize SA. Indeed, the genome of *T. azollae* shows clear traces of an obligate symbiont and—based on its genome structure and its mode of inheritance—was speculated to be an organelle in the making (Ran et al. 2010). Yet no cases of endosymbiotic gene transfer have been reported for the genome of *A. filiculoides* (Li et al. 2018). Indeed, cyanobiont-free *Azolla* species can survive with ample nitrogen supply (Brouwer et al., 2017). Thus, while it is a fascinating area of speculation, we would suggest that *Azolla* does not have to rely on the cyanobionts for the synthesis of its defense hormone.

Overall, it appears to be more likely that *Azolla* uses the PAL-dependent pathway. This does not exclude that *T. azollae* requires host-derived SA. Indeed, that both partners rely on the phytohormone to some degree is in agreement with our previous data, where exogenous application of an SA-derivative triggered alterations in host and cyanobiont gene expression patterns as well as cyanobiont abundance (de Vries et al. 2018). The obvious question following this is, whether SA biosynthesis and SA response can be modulated by the cyanobionts. To gain first insights, we next investigated the expression profile and differential gene expression (DGE) of the PAL-dependent biosynthesis pathway and SA responses of *A. filiculoides* upon changes in nitrogen availability and presence/absence of the cyanobiont.

## **Alterations in the cyanobionts population influence the gene expression patterns for benzoic acid-derived SA biosynthesis**

Nitrogen availability has been shown to modulate expression of genes involved in the synthesis of phenylpropanoid-derived flavonoids in *A. filiculoides* (Güngör et al. 2021). Indeed, the absence of cyanobionts also change expression levels of *CHS* in *A. filiculoides*

(Eily et al. 2019), overall linking the phenylpropanoid-derived compounds to the symbiosis. SA, which is a conceivable phenylpropanoid-derived compound in *A. filiculoides*, is also a regulator of flavonoids (Nugroho et al. 2002, Tounekti et al. 2013, Ni et al. 2018). In bacteria, SA is likely used as a siderophore to sequester iron from iron-poor environments (Visca et al. 1993). Furthermore, in 2018 we have shown that SA can influence the population size of the cyanobionts and their nitrogen fixation-related gene expression (de Vries et al., 2018). To explore these factors, we (a) investigated the gene expression profiles upon these two factors and (b) calculated the DGE for *A. filiculoides* with respect to the PAL-dependent pathway.

To understand the global gene expression patterns of genes for SA synthesis and downstream pathways in *A. filiculoides*, we first analyzed gene expression levels in Transcript Per Million (TPM, supplemental data S2A and S3A). In total, we investigated 19 high-confidence candidate genes; 18 of these showed an average TPM above 1 in at least one condition. *A. filiculoides* invested a pronounced transcript budget into the phenylpropanoid pathway: while the cumulated expression of all genes amounted to an average (over all conditions) of 2734.79±544.91 TPM, the 11 homologs of genes from the canonical phenylpropanoid pathway (7 PAL-, and 4 4CL-homologs) made up 2335.55±535.27 TPM—which was largely due to the PAL homologs. Of the seven putative PAL-coding genes, one distinguished itself (*Azfi\_s0123.g048412*) by dwarfing all the other average gene expression levels with a TPM of 1757.05±338.51. At the same time, *Azfi\_s0123.g048412* had the most stable expression level, never showing differential gene expression changes under the conditions analyzed here. For comparison, the TPM of 4CL amounted to 24.44±11.58.

11 of 19 high-confidence candidate genes for the SA biosynthesis pathway in *A. filiculoides* showed significant changes in their differential gene expression patterns due to supply of fixed nitrogen and/or presence of the cyanobiont (Benjamini Hochberg adjusted FDR ≤ 0.05; Figure 9a based on the pathways shown in Figure 7, Supplemental data S2B); 8 of these 11 genes were up or down-regulated with a  $\log_2(\text{fold-change}[\text{FC}]) > 1$  or  $< -1$ . The absence of fixed nitrogen alone in presence of the cyanobiont (nYcY vs. nNcY) or the absence of the cyanobiont in presence of fixed nitrogen (nYcY vs. nYcN) has only a small effect on the expression of the PAL-dependent biosynthesis pathway: only 3 of 19 genes showed differential gene expression in either of the comparisons. Most changes were observed when comparing the presence of cyanobionts (nNcY) to the absence of cyanobionts (nNcN) in the absence of fixed nitrogen (8/19 differentially expressed genes) and when comparing presence of fixed nitrogen and cyanobiont (nYcY) with the absence of both (nNcN; 9/19 differentially expressed genes). These two comparisons shared seven differentially

expressed genes, of which two (belonging to gene families *PAL* and *BALDH*) were up and five were down-regulated (belonging to gene families *PAL*, *4CL*, *BALDH* and *AAO4*) in both conditions.

The two initial steps in the core phenylpropanoid pathway, *PAL* and *4CL*, the initial step in the  $\beta$ -oxidative pathway (*BZO1*) and the last steps in the conversion of cytoplasmic benzaldehyde to benzoic acid (*AAO4* and *BALDH*) were responsive on a gene regulatory level (Figure 9a). The peroxisomal steps catalyzed by gene families *AIM1*, *DHNAT1/2* and *KAT* showed little differential gene expression; only the *AfKAT* candidate was minimally induced ( $\log_2(\text{FC})=0.38$ ;  $\text{FDR}=0.02$ ) when both nitrogen and cyanobiont conditions were changed (nYcN vs. nNcY). This is in agreement with the phenylpropanoid pathway being regulated on a transcriptional level (e.g. Weisshaar and Jenkins 1998, Deluc et al. 2006, Xie et al. 2008). *PAL* genes are responsive to biotic stressors (Oliva et al. 2015, Reboledo et al. 2021). It is therefore, in general, not surprising that genes from the phenylpropanoid pathway are responsive to the treatment. In addition, the late steps in the pathway are modulated due to the availability of the cyanobiont and fixed nitrogen. Hence not only SA appears to alter the abundance of the cyanobiont and expression of genes relevant for nitrogen fixation (de Vries et al. 2018), availability of both components also influences SA biosynthesis. This suggests an intricate system of communication between the two partners.

The pattern of how SA biosynthesis is regulated on the gene level appears complex. Sometimes it is contrasting within a gene family or opposite responses occur when changes in cyanobiont presence/absence is evaluated compared to when changes in the availability of fixed nitrogen are evaluated. It appears that in the presence of cyanobionts more genes are down-regulated than up-regulated, though (Figure 9a). Assuming that down-regulation of genes in the SA biosynthesis pathway translates into less SA being produced, this appears to be in contrast with SA levels being induced during colonization of some symbionts in other plants (Fernández et al. 2014). However, it was noted that such defenses are early on responses, hypothesized to stop symbionts from too much proliferation (Plett and Martin 2018). An integrated symbiont, however, is a long-term association. Thus, using SA to limit proliferation within a host early on during symbiosis is not relevant. Moreover, in our previous data on exogenous application of MeSA, we observed an increase of the cyanobiont after treatment (de Vries et al. 2018). Taken together with the expression data on the putative SA biosynthesis genes one may hypothesize a feedback loop between the accumulation of SA and the accumulation of the cyanobiont. This is in agreement with MeSA reducing the expression of the gene encoding iron-dependent niFE (de Vries et al. 2018).

## Expression profile of SA responsive pathways in *A. filiculoides* show distinct responses towards the availability of fixed nitrogen and the cyanobiont

In several land plant species, SA levels are induced during interactions with beneficial microbes (Blilou et al. 1999, Blilou et al. 2000, Liu et al. 2003, Pozo et al. 2015). Further cyanobacterial treatment of *A. thaliana* resulted in the induction of SA controlled gene expression (Belton et al. 2020). Above, we showed that gene expression levels associated with SA biosynthesis are reduced in presence of the cyanobionts. Hence, we wondered whether SA responsive genes may also differ in their gene expression in this particular symbiosis compared to less intimate ones.

We downloaded all *A. thaliana* protein sequences of genes that are associated with the term 'SA responses' from TAIR (Lamesch et al., 2011). These 176 sequences were used as a query in a reciprocal BLASTp approach, first against all proteins of *A. filiculoides* and the thusly obtained homologs back against *A. thaliana*. In total we found 105 homologs, of which 97 are high confidence proteins. These 97 homologs correspond to 47 different SA-responsive proteins of *A. thaliana* involved in various processes (Figure 9b, Supplemental data S3B). Overall, 55.7% of the homologs of SA-responsive genes show differential gene expression (FDR<0.05) in at least one comparison. Similar to the SA biosynthesis expression, SA-derived responses showed most differential expressed genes in the comparisons nNcY vs. nNcN (31/97 homologs) and nYcY vs. nNcN (35/97 homologs). Of those genes, 23 were shared between the conditions, nine were up-regulated and 14 down-regulated (FDR<0.05). Corroborating the results of the expression patterns of the SA biosynthesis, changes in the availability of fixed nitrogen have only little influence on the expression of SA responsive genes. Independent of the presence of the cyanobiont only two (nYcY vs. nNcY) and seven genes (nYcN vs. nNcN) were significantly changed in their expression (FDR <0.05). Of those only one (*Azfi\_s0427.g069291*) showed the same direction of regulation, and was induced in both treatments ( $\log_2$ -foldchange=1.64 in nYcY vs. nNcY and  $\log_2$ -foldchange=2.31 in nYcN vs. nNcN). *Azfi\_s0427.g069291* was also induced in comparisons where presence of fixed nitrogen and cyanobiont was changed (FDR<0.05). *Azfi\_s0427.g069291* encodes a putative 2-oxoglutarate (2OG)/Fe(II)-dependent oxygenase (2-ODD) superfamily protein. Given the diversity of reactions in specialized metabolism and hormone homeodynamics that are catalyzed by 2-ODDs it is difficult to make an educated prediction of what the regulation of this 2-ODD means. That said, it is an interesting candidate enzyme for future studies.

Overall, presence of nitrogen compared to its absence and presence of the cyanobiont compared to its absence result in more genes associated with a response to SA being



down-regulated than up-regulated (Figure 9b). This indicates that SA signaling is reduced in the presence of fixed nitrogen. The observation was more pronounced when the presence of the cyanobiont was altered than when the availability of fixed nitrogen was changed. This is due to the generally low transcriptional response to changes in fixed nitrogen. In contrast to the abundance of down-regulated genes in response to a change of one component in the system, changes in both components lead to a complex dysregulation of putative SA-responsive genes (Figure 9b).

Many of the differentially expressed genes are found in the category of transcription factors and MAP kinases. Here most homologs appear down-regulated when the presence of the cyanobiont is compared to its absence, independent of the availability of nitrogen (FDR <0.05, Figure 9b). In the comparison of nYcY vs. nYcN eight *TFs* are down-regulated and only three are up-regulated. Also, two *MAP kinase* homologs are down-regulated and none are up-regulated. In nNcY vs. nNcN 10 *TFs* and four *MAP kinases* show down-regulation, while five *TFs* and no *MAP kinase* show up-regulation. It appears that especially up-stream regulators of defense responses are affected by the presence of the cyanobiont. This is in agreement with the reduction of gene expression of the putative SA biosynthesis pathway we observed in the same comparisons (Figure 9a). In contrast, SA signaling was induced upon treatment of *A. thaliana* with *Nostoc punctiforme* PCC 73102 (Belton et al. 2020), a cyanobacterium from the same family as *Azolla*'s cyanobiont. *N. punctiforme* PCC 73102 is a strain with symbiotic competence that is often used in experiments with cyanobacteria and different hosts (Meeks et al. 2001, Warshan et al. 2017). This fits the hypothesis of Plett and Martin (2018), that early increase in SA during symbioses may be to establish the borders of same associations. However, the association between *T. azollae* and the water fern is perpetual. It is thus to be expected that the usual early responses to encountering potential symbionts are not mirrored in this vertically inherited association. Besides, data on host-symbiont interaction is often gathered from angiosperm systems. Data related to SA signaling in other plants during interaction with pathogenic microorganisms already indicate differences in the defense network; for example, the antagonism between SA and another phytohormone, jasmonic acid, appears to not exist in spruce during infection with a necrotrophic pathogen (Arnerup et al. 2013). Additionally, it appears that the genes coding for the Arabidopsis SA receptors AtNPR1, 3 and 4, which have contrasting roles in SA signaling (Ding et al. 2018), arose from a lineage-specific radiation (Li et al. 2020, supplemental data therein). In *A. filiculoides* two possible candidates for *NPR* homologs, likely derived from a lineage-specific duplication, are found (Li et al. 2020, supplemental data therein). Euphyllophytes thus likely had only a single ancestral *NPR* protein. Given these

data, it is reasonable to assume that SA signaling is in *A. filiculoides* in general and in the symbiosis of the fern only partially similar to that of model angiosperms.

## Conclusion

The phytohormone SA is important for biotic interactions in plants and iron-sequestration in bacteria. Previously, we showed that SA is a candidate molecule involved in the tight coordination of the symbiosis between *A. filiculoides* and its cyanobionts (de Vries et al., 2018). Here, we investigated the possible routes by which SA may be synthesized in *A. filiculoides* as well as how the cyanobiont and the availability of fixed nitrogen influence gene expression patterns that can be associated with SA biosynthesis and signaling. Our data pinpoint that the most likely biosynthetic route towards SA in the fern derives from benzoic acid, rather than isochorismate. Although the cyanobiont is genetically capable of synthesizing the latter, it lacks genes encoding IPL or salicylate synthase to convert isochorismate or chorismate to SA. Most genes relevant for SA biosynthesis in the water fern as well as homologs to genes associated with response to SA are down-regulated in *A. filiculoides* with a cyanobiont compared to a *Trichormus*-free culture. Most of the differential regulation appears to be on up-stream regulators such as *TFs* and *MAP kinases*. Taken our previous and new data together, SA might participate in a feedback loop between *A. filiculoides* and *T. azollae*.

## ACKNOWLEDGEMENTS

JdV thanks the European Research Council for funding under the European Union's Horizon 2020 research and innovation programme (Grant Agreement No. 852725; ERC-StG "TerreStriAL"). IF gratefully acknowledges support by the Deutsche Forschungsgemeinschaft (INST 186/822-1).

## TABLE

**Table 1. Quantification of salicylic acid (SA) in root and green sporophyte tissues of *Azolla filiculoides* via HPLC-MS/MS.**

| tissue type | biological replicate | weight f.w. [g] | SA [nmol/g f.w.] |
|-------------|----------------------|-----------------|------------------|
| whole root  | I                    | 0.02            | 0.22             |
|             | II                   | 0.01            | 0.17             |
|             | III                  | 0.025           | 0.14             |
| sporophyte  | I                    | 0.105           | 0.1              |
|             | II                   | 0.1             | 0.11             |
|             | III                  | 0.11            | 0.07             |

Abbreviations: f.w. = fresh weight

## FIGURE LEGENDS

**Figure 1. Evolution of chorismate binding enzymes in the green lineage.** (a) ML-phylogeny of chorismate binding enzymes from Chloroplastida with 100 bootstrap replicates. Sequences from *A. thaliana* are highlighted in pink and sequences of *A. filiculoides* are highlighted in blue. We recovered three clear clades, one for isochorismate synthases (ICS), one for aminodeoxychorismate synthases and *p*-aminobenzoate synthases and one for anthranilate synthases. Bootstrap support of 100 is indicated by black dots on the branches. On the right we indicate TIGR domain annotations for the for different categories of chorismate binding enzymes. Black dots indicate which domain was found; no dot indicates that no TIGR domain annotation was present for this sequence. White dots only occur for collapsed branches, to indicate for which of the collapsed sequences a domain annotation was available (black dot) and for which not (white dot). (b) Conserved sequence logos for the clades containing anthranilate synthase, aminodeoxychorismate/*p*-aminobenzoate synthase and isochorismate synthase (ICS) shown in (a). Highlighted residues correspond to amino acids that have been suggested to be functionally relevant for the product specificity of these enzyme categories in Plach et al. (2015).

**Figure 2. Phylogeny of PAL and HAL sequences from eukaryotes and prokaryotes.** ML-phylogeny of eukaryotic phenylammonia lyases (PAL) and HALs with 100 bootstrap replicates; LG+G4 was chosen as model for protein evolution according to Bayesian Information Criterion. Sequences for PAL in plants have been identified using an HMM approach. Sequences from fungal PALs and eukaryote HALs have been selected from de Vries et al. (2017). Sequences from *A. thaliana* have been highlighted in pink, *A. filiculoides* is highlighted in blue, sequences from *S. bicolor* are indicated in black and TAM1 from *Oryza sativa* is highlighted in orange. Bootstrap support of 100 is indicated by black and colored dots on the branches. The clades with fungal PAL and plant tRNA synthase sequences have been collapsed. The substrate-specificity defining residues 123 and 443 of *S. bicolor* PTAL (Sb04g026510) have been analyzed for all sequences in the alignment and are indicated on the right next to the respective sequences. One exception is the collapsed branch of fungal PALs. Due to the variance of residue 123 the sequence logo for the two residues is printed on the branch itself.

**Figure 3. Phylogeny of Hydratases in Chloroplastida.** ML-phylogeny pointing the evolutionary history of AIM1/CHD hydratases in chloroplastida using 100 bootstrap replicates; LG+I+G4 was chosen as model for protein evolution according to Bayesian

Information Criterion. The AIM1 sequence of *A. thaliana* is highlighted in purple, its ortholog *PhCHD* from *Petunia hybrida* is highlighted in light pink and sequence from *A. filiculoides* is highlighted in blue. Bootstrap levels = 100 are indicated by black dots.

**Figure 4. ML-phylogeny determining the evolutionary history of KAT sequences in chloroplastida.** The phylogeny is based on 100 bootstrap replicates; LG+I+G4 was chosen as model for protein evolution according to Bayesian Information Criterion. Sequences from *A. thaliana* are shown in purple, the *PhKAT* sequence from *P. hybrida* is shown in light pink and the sequence from *A. filiculoides* is highlighted in blue. Clades with brassicaceae and angiosperm KAT sequences have been highlighted in purple, Solanaceae KAT sequences are indicated by a pink box and fern KAT sequences are indicated by a blue box. Bootstrap levels of a 100 are indicated by dots along the branches.

**Figure 5. Phylogeny of the DHNAT family.** ML-phylogeny was computed with IQ-Tree version multicore version 1.5.5 for Linux 64-bit with 100 bootstrap-replicates; JTT+I+G4 was chosen as model for protein evolution according to Bayesian Information Criterion. Bootstrap support of 100 is indicated by black and colored dots on the individual branches. DHNAT1 and 2 from *A. thaliana* are indicated in purple, the monophyletic DHNAT1 clade is highlighted in purple and the monophyletic DHNAT2 clade is highlighted in pink. DHNAT orthologs in ferns are highlighted in blue and the sequences from *A. filiculoides* is written in blue and bold.

**Figure 6. Evolution of the AAO family.** ML-phylogeny with 100 bootstrap replicates to recover the evolution of the AAO family; LG+F+I+G4 was chosen as model for protein evolution according to Bayesian Information Criterion. The blastp searches identified sequences either belonging to xanthin dehydrogenase (XDH) and AAO clades. The AAO clade is highlighted in purple and the XDH clade is highlighted in brown. Sequences from *A. thaliana* are indicated in pink and sequences from *A. filiculoides* are indicated in blue. Bootstrap support of 100 is indicated by black dots.

**Figure 7. Routes of SA biosynthesis in land plants.** SA can be derived from isochorismate or benzoic acid. The route from isochorismate requires ICS and a GH3 enzyme (Wildermuth et al., 2001, Garcion et al. 2008, Rekhter et al. 2019, Torrens-Spence et al. 2019), whereas the benzoic acid-derived SA pathway is less direct requires several steps that function also in other pathways. The reactions are indicated by arrows and the responsible enzymes are written on top of these arrows. Grey enzyme names indicate steps that have not been analyzed in this study because (i) data was available from previous

studies or (ii) sequences for these enzymes are not available from functionally characterized enzymes because there is only indirect evidence. Boxes below the arrows indicate the number of high-confidence sequences available in the genome of *A. filiculoides*. Grey boxes indicate absence in *A. filiculoides*, blue boxes indicate the presence of homologs in the fern and pink boxes indicate presence of orthologs encoded in the genome of *A. filiculoides*.

**Figure 8. Chorismate-binding enzymes in cyanobacteria.** (a) Three chorismate-binding enzymes, an isochorismate (ICS), anthranilate synthase (AS) and aminodeoxychorismate synthase (ADCS), were identified in *T. azollae* using a blastp search. Protein domains identified via TIGR are drawn to scale (blue= isochorismate synthase domain, yellow = anthranilate synthase component I, red = ADCS component I domain). Amino acid positions are indicated by the bar above. (b) Number of blastp hits for IPL in cyanobacteria, using the IPL sequence of *P. aeruginosa* sorted according to taxonomy. Hits recovering sequences from the Nostocales are highlighted by a brown box. (c) Number of hits recovered through a blastp search for salicylate synthase with the sequence from *M. tuberculosis* as query sorted according to cyanobacterial taxonomy. Hits to Nostocales are highlighted by a brown box. (d) Sequence logos for the conserved regions in chorismate binding enzymes. Highlighted in blue and orange are residues relevant for substrate specificity (Plach et al. 2015).

**Figure 9. Differential gene expression of homologs of genes for SA biosynthesis and SA responses.** (a) Differential gene expression of genes associated with the PAL-dependent pathway for SA biosynthesis in *A. filiculoides*, including candidates for *AfPAL*, *Af4CL*, *AfAAE clade VI* (i.e. the closest homologs to *AtBOZ1* and *PhCNL* in *A. filiculoides*), *AfAIM1*, *AfKAT*, *AfDHNAT*, *AfBALDH*, and *AfAAO4*. (b) Differential gene expression of homologs of SA-responsive genes. Significant differential regulation is indicated by blue and yellow colors. Light yellow indicates significant differential up-regulation ( $FDR \leq 0.05$ ) with a  $\log_2(FC)$  above 0 and below 1, dark yellow indicates significant differential up-regulation ( $FDR \leq 0.05$ ) with a  $\log_2(FC)$  above 1. Light blue indicates differential significant down-regulation ( $FDR \leq 0.05$ ) with a  $\log_2(FC)$  below 0 but above -1 and dark blue indicates significant down-regulation ( $FDR \leq 0.05$ ) with a  $\log_2(FC)$  below -1.

## REFERENCES

- Adebesin F., Widhalm J.R., Lynch J.H., McCoy R.M. & Dudareva N. (2018) A peroxisomal thioesterase plays auxiliary roles in plant  $\beta$ -oxidative benzoic acid metabolism. *The Plant Journal* **93**, 905–916.
- Amborella Genome Project (2013) The *Amborella* genome and the evolution of flowering plants. *Science*, 342, 1241089

- Ankenbauer R.G. & Cox C.D. (1988) Isolation and characterization of *Pseudomonas aeruginosa* mutants requiring salicylic acid for pyochelin biosynthesis. *Journal of Bacteriology* **170**, 5364–5367.
- Argout, X., Salse, J., Aury, J.-M., Guiltinan, M. J., Droc, G., Gouzy, J., ... Lanaud, C. (2011). The genome of *Theobroma cacao*. *Nature Genetics*, 43, 101–108.
- Arnerup J., Nemesio-Goriz M., Lundén K., Asiegbu F.O., Stenlid J. & Elfstrand M. (2012) The primary module in Norway spruce defence signalling against *H. annosum* s.l. seems to be jasmonate-mediated signalling without antagonism of salicylate-mediated signalling. *Planta* **237**, 1037–1045.
- Banks, J. A., Nishiyama, T., Hasebe, M., Bowman, J.L., Gribskov, N., dePamphilis, C., Albert, V. A., ... Grigoriev, I. V. (2011). The Selaginella genome identifies genetic changes associated with the evolution of vascular plants. *Science*, 332, 960-963.
- Becking J.H. (1987) Endophyte transmission and activity in the *Anabaena-Azolla* association. *Plant and Soil* **100**, 183–212.
- Belton S., McCabe P.F. & Ng C.K.Y. (2021) The cyanobacterium, *Nostoc punctiforme* can protect against programmed cell death and induce defence genes in *Arabidopsis thaliana*. *Journal of Plant Interactions* **16**, 64–74.
- Blilou I., Ocampo J., & García Garrido J. (1999) Resistance of pea roots to endomycorrhizal fungus or *Rhizobium* correlates with enhanced levels of endogenous salicylic acid. *Journal of Experimental Botany* **50**, 1663-1668.
- Blilou I., Ocampo J., & Garcia-Garrido J. 2000. Induction of *Ltp* (lipid transfer protein) and *PAL* (phenylalanine ammonia lyase) gene expression in rice roots colonized by the arbuscular mycorrhizal fungus *Glomus mossae*. *Journal of Experimental Botany* **51**, 1969-1977.
- Blum M., Chang H.-Y., Chuguransky S., Grego T., Kandasaamy S., Mitchell A., ... Finn R.D. (2021) The InterPro protein families and domains database: 20 years on. *Nucleic Acids Research* **49**, D344–D354.
- Block A., Widhalm J.R., Fatihi A., Cahoon R.E., Wamboldt Y., Elowsky C., ... Basset G.J. (2014) The Origin and Biosynthesis of the Benzenoid Moiety of Ubiquinone (Coenzyme Q) in *Arabidopsis*. *The Plant Cell* **26**, 1938–1948.
- Bowman, J. L., Kohchi, T., Yamato, K.T., Jenkins, J., Shu, S., Ishizaki, K., ... Schmutz, J. (2017). Insights into land plant evolution garnered from the *Marchantia polymorpha* genome. *Cell*, 171, 287-304.
- Brouwer P., Br utigam A., Buijs V.A., Tazelaar A.O.E., van der Werf A., Schlüter U., ... Schluepmann H. (2017) Metabolic Adaptation, a Specialized Leaf Organ Structure and Vascular Responses to Diurnal N2 Fixation by *Nostoc azollae* Sustain the Astonishing



953 Productivity of Azolla Ferns without Nitrogen Fertilizer. *Frontiers in Plant Science* **8**, 15–  
954 16.

955 Bussell J.D., Reichelt M., Wiszniewski A.A.G., Gershenzon J. & Smith S.M. (2014)  
956 Peroxisomal ATP-Binding Cassette Transporter COMATOSE and the Multifunctional  
957 Protein ABNORMAL INFLORESCENCE MERISTEM Are Required for the Production  
958 of Benzoylated Metabolites in Arabidopsis Seeds. *Plant Physiology* **164**, 48–54.

959 Calvert H.E. & Peters G.A. (1981) The Azolla-Anabaena azollae relationship. *New*  
960 *Phytologist* **89**, 327–335.

961 Calvert H.E., Pence M.K. & Peters G.A. (1985) Ultrastructural ontogeny of leaf cavity  
962 trichomes in Azolla implies a functional role in metabolite exchange. *Protoplasma* **129**,  
963 10–27.

964 Carpenter E.J., Matasci N., Ayyampalayam S., Wu S., Sun J., Yu J., ... Wong G.K.-S.  
965 (2019) Access to RNA-sequencing data from 1,173 plant species: The 1000 Plant  
966 transcriptomes initiative (1KP). *GigaScience* **8**, giz126.

967 Carrapiço F (2006) Is the *Azolla-Anabaena* symbiosis a co-evolution case? In: Sitnykov A  
968 (ed) *General botany: traditions and perspectives*. Kazan University, Kazan, pp 193–  
969 195

970 Cheng, S., Xian, W., Fu, Y., Marin, B., Keller, J., Wu, T., ... Melkonian, M. (2019) Genomes  
971 of subaerial Zygnematophyceae provide insights into land plant evolution. *Cell*, 179,  
972 1057-1067.e14.

973 Cochrane F.C., Davin L.B. & Lewis N.G. (2004) The Arabidopsis phenylalanine ammonia  
974 lyase gene family: kinetic characterization of the four PAL isoforms. *Phytochemistry*  
975 **65**, 1557–1564.

976 Collinson M.E. (2002) The ecology of Cainozoic ferns. *Review of Palaeobotany and*  
977 *Palynology* **119**, 51–68.

978 Colquhoun T.A., Marciniak D.M., Wedde A.E., Kim J.Y., Schwieterman M.L., Levin L.A., ...  
979 Clark D.G. (2012) A peroxisomally localized acyl-activating enzyme is required for  
980 volatile benzenoid formation in a *Petunia* hybrid cv. 'Mitchell Diploid' flower. *Journal*  
981 *of Experimental Botany* **63**, 4821–4833.

982 Coquoz J.-L., Buchala A. & Métraux J.-P. (1998) The Biosynthesis of Salicylic Acid in Potato  
983 Plants. *Plant Physiology* **117**, 1095–1101.

984 Danielsson M., Lundén K., Elfstrand M., Hu J., Zhao T., Arnerup J., ... Stenlid J. (2011)  
985 Chemical and transcriptional responses of Norway spruce genotypes with different  
986 susceptibility to *Heterobasidion* spp. infection. *BMC Plant Biology* **11**, 154.

987 Daruwala R., Kwon O., Meganathan R. & Hudspeth M.E.S. (1996) A new isochorismate  
988 synthase specifically involved in menaquinone (vitamin K<sub>2</sub>) biosynthesis encoded by  
989 the *menF* gene. *FEMS Microbiology Letters* **140**, 159–163.

990 de Vries J., de Vries S., Slamovits C.H., Rose L.E. & Archibald J.M. (2017) How  
991 Embryophytic is the Biosynthesis of Phenylpropanoids and their Derivatives in  
992 Streptophyte Algae? *Plant and Cell Physiology* **58**, 934–945.

993 de Vries S., de Vries J., von Dahlen J.K., Gould S.B., Archibald J.M., Rose L.E. & Slamovits  
994 C.H. (2018) On plant defense signaling networks and early land plant evolution.  
995 *Communicative & Integrative Biology* **11**, 1–14.

996 de Vries S., de Vries J., Teschke H., von Dahlen J.K., Rose L.E. & Gould S.B. (2018)  
997 Jasmonic and salicylic acid response in the fern *Azolla filiculoides* and its cyanobiont.  
998 *Plant, Cell & Environment* **41**, 2530–2548.

999 de Vries S. & de Vries J. (2018) *Azolla*: A Model System for Symbiotic Nitrogen Fixation and  
1000 Evolutionary Developmental Biology. In *Current Advances in Fern Research*. pp. 21–  
1001 46. Springer International Publishing, Cham.

1002 de Vries J., Curtis B.A., Gould S.B. & Archibald J.M. (2018) Embryophyte stress signaling  
1003 evolved in the algal progenitors of land plants. *Proceedings of the National Academy*  
1004 *of Sciences of the United States of America* **115**, E3471–E3480.

1005 de Vries J., Vries S., Curtis B.A., Zhou H., Penny S., Feussner K., ... Archibald J.M. (2020)  
1006 Heat stress response in the closest algal relatives of land plants reveals conserved  
1007 stress signaling circuits. *The Plant Journal* **324**, 1064–24.

1008 Deluc L., Barrieu F., Marchive C., Lauvergeat V., Decendit A., Richard T., ... Hamdi S.  
1009 (2006) Characterization of a grapevine R2R3-MYB transcription factor that regulates  
1010 the phenylpropanoid pathway. *Plant Physiology* **140**, 499–511.

1011 Ding Y., Sun T., Ao K., Peng Y., Zhang Y., Li X. & Zhang Y. (2018) Opposite roles of  
1012 salicylic acid receptors NPR1 and NPR3/NPR4 in transcriptional regulation of plant  
1013 immunity. *Cell* **173**, 1454–1467.e15.

1014 Ding P. & Ding Y. (2020) Stories of Salicylic Acid: A Plant Defense Hormone. *Trends in*  
1015 *Plant Science* **25**, 549–565.

1016 Dijkhuizen L.W., Brouwer P., Bolhuis H., Reichart G.-J., Koppers N., Huettel B., ...  
1017 Schluepmann H. (2017) Is there foul play in the leaf pocket? The metagenome of  
1018 floating fern *Azolla* reveals endophytes that do not fix N<sub>2</sub> but may denitrify. *New*  
1019 *Phytologist* **217**, 453–466.

1020 Eily A.N., Pryer K.M. & Li F.-W. (2019) A first glimpse at genes important to the *Azolla*–  
1021 *Nostoc* symbiosis. *Symbiosis* **78**, 149–162.

1022 El-Gebali S., Mistry J., Bateman A., Eddy S.R., Luciani A., Potter S.C., Qureshi M.,  
1023 Richardson L.J., Salazar G.A., Smart A., Sonnhammer E.L.L., Hirsh L., Paladin L.,  
1024 Piovesan D., Tosatto S.C.E., & Finn R.D. (2019) The Pfam protein families database in  
1025 2019. *Nucleic Acids Research* **47**, D427–D432.

1026 Fernández I., Merlos M., López-Ráez J.A., Martínez-Medina A., Ferrol N., Azcón C., ... Pozo  
1027 M.J. (2014) Defense Related Phytohormones Regulation in Arbuscular Mycorrhizal  
1028 Symbioses Depends on the Partner Genotypes. *Journal of Chemical Ecology* **40**, 791–  
1029 803.

1030 Fürst-Jansen J.M.R., de Vries S. & de Vries J. (2020) Evo-physio: on stress responses and  
1031 the earliest land plants. *Journal of Experimental Botany* **66**, 4–16.

1032 Gaille C., Kast P., & Haas D. (2002) Salicylate biosynthesis in *Pseudomonas aeruginosa*.  
1033 *The Journal of Biological Chemistry* **277**, 21768-21775.

1034 Garcion C., Lohmann A., Lamodièrre E., Catinot J., Buchala A., Doermann P. & Métraux J.-  
1035 P. (2008) Characterization and Biological Function of the *ISOCHORISMATE*  
1036 *SYNTHASE2* Gene of Arabidopsis. *Plant Physiology* **147**, 1279–1287.

1037 Gross J., Cho W.K., Lezhneva L., Falk J., Krupinska K., Shinozaki K., ... Meurer J. (2006) A  
1038 plant locus essential for phyloquinone (vitamin K1) biosynthesis originated from a  
1039 fusion of four eubacterial genes. *Journal of Biological Chemistry* **281**, 17189–17196.

1040 Güngör E., Brouwer P., Dijkhuizen L.W., Shaffar D.C., Nierop K.G.J., Vos R.C.H., ...  
1041 Schluepmann H. (2021) *Azolla* ferns testify: seed plants and ferns share a common  
1042 ancestor for leucoanthocyanidin reductase enzymes. *New Phytologist* **229**, 1118–  
1043 1132.

1044 Hall J.W., Swanson N.P. (1968) Studies on fossil *Azolla*: *Azolla montana*, a Cretaceous  
1045 megaspore with many small floats. *American Journal of Botany* **55**, 1055-1061.

1046 Hill D.J. (1989) The control of the cell cycle in microbial symbionts. *New Phytologist* **112**,  
1047 175–184.

1048 Hori, K., Maruyama, F., Fujisawa, T., Togashi, T., Yamamoto, N., Seo, M., ... Ohta, H.  
1049 (2014). *Klebsormidium flaccidum* genome reveals primary factors for plant terrestrial  
1050 adaptation. *Nature Communications*, 5, 3978.

1051 Ibdah M., Chen Y.-T., Wilkerson C.G. & Pichersky E. (2009) An Aldehyde Oxidase in  
1052 Developing Seeds of Arabidopsis Converts Benzaldehyde to Benzoic Acid. *Plant*  
1053 *Physiology* **150**, 416–423.

1054 Iven T., König S., Singh S., Braus-Stromeier S.A., Bischoff M., Tietze L.F., Braus G.H.,  
1055 Lipka V., Feussner I., Dröge-Laser W. (2012) Transcriptional activation and production  
1056 of tryptophan-derived secondary metabolites in Arabidopsis roots contributes to the  
1057 defense against the fungal vascular pathogen *Verticillium longisporum*. *Molecular*  
1058 *Plant* **5**, 1389-1402.

1059 Jiao, C., Sørensen, I., Sun, X., Sun, H., Behar, H., Alseekh, S., ... Rose, J. K. C. (2020). The  
1060 *Penium margaritaceum* genome: hallmarks of the origins of land plants. *Cell*, 181,  
1061 P1097-1111.E12

1062 Jones D.T., Taylor W.R. & Thornton J.M. (1992) The rapid generation of mutation data  
1063 matrices from protein sequences. *Bioinformatics* **8**, 275–282.

1064 Jun S.-Y., Sattler S.A., Cortez G.S., Vermerris W., Sattler S.E. & Kang C. (2018)  
1065 Biochemical and Structural Analysis of Substrate Specificity of a Phenylalanine  
1066 Ammonia-Lyase. *Plant Physiology* **176**, 1452–1468.

1067 Kalyaanamoorthy S., Minh B.Q., Wong T.K.F., von Haeseler A. & Jermiin L.S. (2017)  
1068 ModelFinder: fast model selection for accurate phylogenetic estimates. *Nature*  
1069 *methods* **14**, 587–589.

1070 Katoh K. & Standley D.M. (2013) MAFFT Multiple Sequence Alignment Software Version 7:  
1071 Improvements in Performance and Usability. *Molecular Biology and Evolution* **30**, 772–  
1072 780.

1073 Klempien A., Kaminaga Y., Qualley A., Nagegowda D.A., Widhalm J.R., Orlova I., ...  
1074 Dudareva N. (2012) Contribution of CoA Ligases to Benzenoid Biosynthesis in Petunia  
1075 Flowers. *The Plant Cell* **24**, 2015–2030.

1076 Kolappan S., Zwahlen J., Zhou R., Truglio J.J., Tonge P.J. & Kisker C. (2007) Lysine 190 Is  
1077 the Catalytic Base in MenF, the Menaquinone-Specific Isochorismate Synthase from  
1078 *Escherichia coli*: Implications for an Enzyme Family<sup>†</sup>. *Biochemistry* **46**, 946–953.

1079 Kwon O. & Meganathan R. (2009) Biosynthesis of Menaquinone (Vitamin K<sub>2</sub>) and  
1080 Ubiquinone (Coenzyme Q). *EcoSal Plus* **3**.

1081 Lamesch, P., Berardini, T. Z., Li, D., Swarbreck, D., Wilks, C., Sasidharan, R., ... Huala, E.  
1082 (2011). The Arabidopsis Information Resource (TAIR): improved gene annotation and  
1083 new tools. *Nucleic Acids Research*, 40, D1202-D1210.

1084 Lang, D., Ullrich, K. K., Murat, F., Fuchs, J., Jenkins, J., Haas, F. B., ... Rensing, S. A.  
1085 (2018) The *Physcomitrella patens* chromosome-scale assembly reveals moss genome  
1086 structure and evolution. *The Plant Journal*, 93, 515–533.

1087 Le S.Q. & Gascuel O. (2008) An improved general amino acid replacement matrix.  
1088 *Molecular Biology and Evolution* **25**, 1307–1320.

1089 Lee S., Kaminaga Y., Cooper B., Pichersky E., Dudareva N. & Chapple C. (2012)  
1090 Benzoylation and sinapoylation of glucosinolate R-groups in Arabidopsis: *Acylation of*  
1091 *glucosinolates in Arabidopsis*. *The Plant Journal* **72**, 411–422.

1092 Leon J., Shulaev V., Yalpani N., Lawton M.A. & Raskin I. (1995) Benzoic acid 2-hydroxylase,  
1093 a soluble oxygenase from tobacco, catalyzes salicylic acid biosynthesis. *Proceedings*  
1094 *of the National Academy of Sciences* **92**, 10413–10417.

1095 Li F.-W., Brouwer P., Carretero-Paulet L., Cheng S., de Vries J., Delaux P.-M., ... Pryer K.M.  
1096 (2018) Fern genomes elucidate land plant evolution and cyanobacterial symbioses.  
1097 *Nature Plants* **4**, 460–472.

1098 Li F.-W., Nishiyama T., Waller M., Frangedakis E., Keller J., Li Z., ... Szövényi P. (2020)  
1099 Anthoceros genomes illuminate the origin of land plants and the unique biology of  
1100 hornworts. *Nature Plants* **6**, 259–272.

1101 Liu J., Blaylock L., Endre G., Cho J., Town C., VandenBosch K., & Harrison M. (2003)  
1102 Transcript profiling coupled with spatial expression analysis reveals genes involved in  
1103 distinct developmental stages of the arbuscular mycorrhizal symbiosis. *The Plant Cell*  
1104 **15**, 2106-2123.

1105 Long M.C., Nagegowda D.A., Kaminaga Y., Ho K.K., Kish C.M., Schnepf J., ... Dudareva N.  
1106 (2009) Involvement of snapdragon benzaldehyde dehydrogenase in benzoic acid  
1107 biosynthesis. *The Plant Journal* **59**, 256–265.

1108 Matyash V, Liebisch G, Kurzchalia TV, Shevchenko A, Schwudke D (2008) Lipid extraction  
1109 by methyl-tert-butyl ether for high-throughput lipidomics. *Journal of Lipid Research* **49**,  
1110 1137-1146.

1111 Marchler-Bauer A. & Bryant S.H. (2004) CD-Search: protein domain annotations on the fly.  
1112 *Nucleic Acids Research* **32**, W327–W331.

1113 Meeks J.C., Elhai J., Thiel T., Potts M., Larimer F., Lamerdin J., Predki P., & Atlas R. (2001)  
1114 An overview of the genome of *Nostoc punctiforme*, a multicellular, symbiotic  
1115 cyanobacterium. *Photosynthesis Research* **70**, 85–106.

1116 Meuwly P., Molders W., Buchala A. & MCTraux J.-P. (1995) Local and systemic biosynthesis  
1117 of salicylic acid in infected cucumber plants. *Plant Physiology* **109**, 1107-1114.

1118 Mistry J., Finn R.D., Eddy S.R., Bateman A. & Punta M. (2013) Challenges in homology  
1119 search: HMMER3 and convergent evolution of coiled-coil regions. *Nucleic Acids*  
1120 *Research* **41**, e121–e121.

1121 Nguyen L.-T., Schmidt H.A., von Haeseler A. & Minh B.Q. (2015) IQ-TREE: A Fast and  
1122 Effective Stochastic Algorithm for Estimating Maximum-Likelihood Phylogenies.  
1123 *Molecular Biology and Evolution* **32**, 268–274.

1124 Ni J., Dong L., Jiang Z., Yang X., Sun Z., Li J., ... Xu M. (2018) Salicylic acid-induced  
1125 flavonoid accumulation in *Ginkgo biloba* leaves is dependent on red and far-red light.  
1126 *Industrial Crops and Products* **118**, 102–110.

1127 Nishiyama, T., Sakayama, H., de Vries, J., Buschmann, H., Saint-Marcoux, D., Ullrich, K. K.,  
1128 ... Rensing, S. A. (2018). The *Chara* genome: secondary complexity and implications  
1129 for plant terrestrialization. *Cell*, 174, 448–464.

1130 Nugroho L.H., Verberne M.C. & Verpoorte R. (2002) Activities of enzymes involved in the  
1131 phenylpropanoid pathway in constitutively salicylic acid-producing tobacco plants. *Plant*  
1132 *Physiology and Biochemistry* **40**, 755–760.

1133 Nystedt, B., Street, N. R., Wetterbom, A., Zuccolo, A., Lin, Y.-C., Scofield, D. G., ...  
1134 Jansson, S. (2013). The Norway spruce genome sequence and conifer genome  
1135 evolution. *Nature*, 497, 579-584.

1136 Ouyang, S., Zhu, W., Hamilton, J., Lin, H., Campbell, M., Childs, K., ... Buell, C. R. (2007).  
1137 The TIGR Rice Genome Annotation Resource: improvements and new features. *Nucleic  
1138 Acids Research*, 35, D883–D887.

1139 Pallas J.A., Paiva N.L., Lamb C. & Dixon R.A. (1996) Tobacco plants epigenetically  
1140 suppressed in phenylalanine ammonia-lyase expression do not develop systemic  
1141 acquired resistance in response to infection by tobacco mosaic virus. *The Plant  
1142 Journal* **10**, 281–293.

1143 Pereira A.L. & Vasconcelos V. (2014). Classification and phylogeny of the cyanobiont  
1144 *Anabaena azollae* Strasburger: An answered question? *International Journal of  
1145 Systematic and Evolutionary Microbiology*, 64, 1830–1840.

1146 Peters G.A., Toia R.E., Raveed D. & Levine N.J. (1978) The *Azolla*-*Anabaena azollae*  
1147 relationship. VI. Morphological aspects of the association. *New Phytologist* **80**, 583–  
1148 593.

1149 Peters G.A. & Meeks J.C. (1989) The *Azolla*-*Anabaena* symbiosis: basic biology. *Annual  
1150 Review of Plant Biology* **40**, 193–210.

1151 Pereira, A. L., & Carrapiço, F. (2007). Histochemistry of simple hairs from the foliar cavities  
1152 of *Azolla filiculoides*. *Plant Biosystems*, **141**, 323–328.

1153 Perkins S.K. & Peters G.A. (1993) The *Azolla*-*Anabaena* symbiosis: endophyte continuity in  
1154 the *Azolla* life-cycle is facilitated by epidermal trichomes. *New Phytologist* **123**, 53–64.

1155 Plach M.G., Löffler P., Merkl R. & Sterner R. (2015) Conversion of Anthranilate Synthase  
1156 into Isochorismate Synthase: Implications for the Evolution of Chorismate-Utilizing  
1157 Enzymes. *Angewandte Chemie International Edition* **54**, 11270–11274.

1158 Plett J.M. & Martin F.M. (2018) Know your enemy, embrace your friend: using omics to  
1159 understand how plants respond differently to pathogenic and mutualistic  
1160 microorganisms. *The Plant Journal* **93**, 729–746.

1161 Ponce De León I., Schmelz E.A., Gaggero C., Castro A., Álvarez A. & Montesano M. (2012)  
1162 *Physcomitrella patens* activates reinforcement of the cell wall, programmed cell death  
1163 and accumulation of evolutionary conserved defence signals, such as salicylic acid  
1164 and 12-oxo-phytodienoic acid, but not jasmonic acid, upon *Botrytis cinerea* infection:  
1165 *P. patens* defence responses against *B. cinerea*. *Molecular Plant Pathology* **13**, 960–  
1166 974.

1167 Pozo M.J., López-Ráez J.A., Azcón-Aguilar C., & García-Garrido J.M. (2015) Phytohormone  
1168 as integrators of environmental signals in the regulation of mycorrhizal symbiosis. *New  
1169 Phytologist* **205**, 1431-1436.



1170 Qualley A.V., Widhalm J.R., Adebessin F., Kish C.M. & Dudareva N. (2012) Completion of the  
1171 core -oxidative pathway of benzoic acid biosynthesis in plants. *Proceedings of the*  
1172 *National Academy of Sciences* **109**, 16383–16388.

1173 Rai A.N., Soderback E. & Bergman B. (2000) Cyanobacterium-plant symbioses. *New*  
1174 *Phytologist* **147**, 449–481.

1175 Ran L., Larsson J., Vigil-Stenman T., Nylander J.A.A., Ininbergs K., Zheng W.-W., ...  
1176 Bergman B. (2010) Genome Erosion in a Nitrogen-Fixing Vertically Transmitted  
1177 Endosymbiotic Multicellular Cyanobacterium. *PLoS ONE* **5**, e11486.

1178 Reboledo G., d Agorio A., Vignale L., Batista-García R.A., Ponce De León I. (2021)  
1179 Transcriptional profiling reveals conserved and species-specific plant defense  
1180 responses during the interaction of *Physcomitrium patens* with *Botrytis cinerea*. *Plant*  
1181 *Molecular Biology* <https://doi.org/10.1007/s11103-021-01116-0>

1182 Rekhter D., Lüdke D., Ding Y., Feussner K., Zienkiewicz K., Lipka V., ... Feussner I. (2019)  
1183 Isochorismate-derived biosynthesis of the plant stress hormone salicylic acid. *Science*  
1184 **365**, 498–502.

1185 Rippka R., Deruelles J., Waterbury J.B., Herdman M. & Stanier R.Y. (1979) Generic  
1186 assignments, strain histories and properties of pure cultures of cyanobacteria. *Journal*  
1187 *of General Microbiology* **111**, 1–61.

1188 Robinson M.D. & Oshlack A. (2010) A scaling normalization method for differential  
1189 expression analysis of RNA-seq data. *Genome Biology* **11**, R25.

1190 Robinson M.D., McCarthy D.J., & Smyth G.K. (2010) edgeR: A bioconductor package for  
1191 differential expression analysis of digital gene expression data. *Bioinformatics* **26**:  
1192 139–140.

1193 Shapiro S.S. & Wilk M.B. (1965) An analysis of variance test for normality (complete  
1194 samples). *Biometrika*, 591–611.

1195 Shen H., Jin D., Shu J.-P., Zhou X.-L., Lei M., Wei R., ... Yan Y.-H. (2018) Large-scale  
1196 phylogenomic analysis resolves a backbone phylogeny in ferns. *GigaScience* **7**.

1197 Shi D.-J. & Hall D.O. (1988) TheAzolla-Anabaena association: Historical perspective,  
1198 symbiosis and energy metabolism. *The Botanical Review* **54**, 353–386.

1199 Shockey J.M., Fulda M.S. & Browse J. (2003) Arabidopsis contains a large superfamily of  
1200 acyl-activating enzymes. Phylogenetic and biochemical analysis reveals a new class of  
1201 acyl-coenzyme a synthetases. *Plant Physiology* **132**, 1065–1076.

1202 Sierro, N. Battey, J., Ouadi, S., Bakaher, N., Bovet, L., Willig, A., Goepfert, S., Peitsch, M.  
1203 C., & Ivanov, N. V. (2014). The tobacco genome sequence and its comparison with  
1204 those of tomato and potato. *Nature Communications*, **5**, 3833.

1205 Slotte, T., Hazzouri, K. M., Ågren, J. A., Koenig, D., Maumus, F., Guo, Y.-L., ... Wrigth, S. I.  
1206 (2013). The *Capsella rubella* genome and the genomic consequences of rapid mating  
1207 system evolution. *Nature Genetics*, 45, 831–835

1208 Student (1908) The probable error of a mean. *Biometrika* 6, 1–25.

1209 The International *Brachypodium* Initiative. (2010). Genome sequencing and analysis of the  
1210 model grass *Brachypodium distachyon*. *Nature*, 463, 763–768.

1211 Toribio A.J., Suárez-Estrella F., Jurado M.M., López M.J., López-González J.A. & Moreno J.  
1212 (2020) Prospection of cyanobacteria producing bioactive substances and their  
1213 application as potential phytostimulating agents. *Biotechnology Reports* 26, e00449.

1214 Torrens-Spence M.P., Bobokalonova A., Carballo V., Glinkerman C.M., Pluskal T., Shen A.  
1215 & Weng J.-K. (2019) PBS3 and EPS1 Complete Salicylic Acid Biosynthesis from  
1216 Isochorismate in *Arabidopsis*. *Molecular Plant* 12, 1577–1586.

1217 Tounekti T., Hernández I. & Munné-Bosch S. (2013) Salicylic Acid Biosynthesis and Role in  
1218 Modulating Terpenoid and Flavonoid Metabolism in Plant Responses to Abiotic Stress.  
1219 In *Salicylic Acid*. (eds S. Hayat, A. Ahmad & M.N. Alyemeni), pp. 141–162. Springer  
1220 Netherlands, Dordrecht.

1221 Van Moerkercke A., Schauvinhold I., Pichersky E., Haring M.A. & Schuurink R.C. (2009) A  
1222 plant thiolase involved in benzoic acid biosynthesis and volatile benzenoid production.  
1223 *The Plant Journal* 60, 292–302.

1224 Visca P., Ciervo A., Sanfilippo V. & Orsi N. (1993) Iron-regulated salicylate synthesis by  
1225 *Pseudomonas* spp. *Journal of General Microbiology* 139, 1995–2001.

1226 Vlot A.C., Dempsey D.M.A., & Klessig D.F. (2009). Salicylic acid, a multifaceted hormone to  
1227 combat disease. *Annual Review of Phytopathology* 47, 177-206.

1228 Wan, T. et al. (2018). A genome for gnetophytes and early evolution of seed plants. *Nature*  
1229 *Plants*, 4, 82–89.

1230 Wang, S., Li, L., Li, H., Sahu, S. K., Wang, H., Xu, Y., ... Liu, X. (2020) Genomes of early-  
1231 diverging streptophyte algae shed light on plant terrestrialization. *Nature Plants*, 6, 95-  
1232 106.

1233 Warshan D., Espinoza J.L., Stuart R.K., Richter R.A., Kim S.-Y., Shapiro N., ... Rasmussen  
1234 U. (2017) Feathermoss and epiphytic Nostoc cooperate differently: expanding the  
1235 spectrum of plant–cyanobacteria symbiosis. *The ISME Journal* 11, 2821–2833.

1236 Weisshaar B. & Jenkins G.I. (1998) Phenylpropanoid biosynthesis and its regulation. *Current*  
1237 *Opinion in Plant Biology* 1, 251–257.

1238 Wildermuth M.C., Dewdney J., Wu G. & Ausubel F.M. (2001) Isochorismate synthase is  
1239 required to synthesize salicylic acid for plant defence. *Nature* 414, 562–565.

1240 Widhalm J.R., Ducluzeau A.-L., Buller N.E., Elowsky C.G., Olsen L.J. & Basset G.J.C.  
1241 (2012) Phylloquinone (vitamin K1) biosynthesis in plants: two peroxisomal

1242 thioesterases of lactobacillales origin hydrolyze 1,4-dihydroxy-2-naphthoyl-coa: Plant  
1243 DHNA-CoA thioesterases. *The Plant Journal* **71**, 205–215.

1244 Widhalm J.R. & Dudareva N. (2015) A Familiar Ring to It: Biosynthesis of Plant Benzoic  
1245 Acids. *Molecular Plant* **8**, 83–97.

1246 Yan J., Aboshi T., Teraishi M., Strickler S.R., Spindel J.E., Tung C.-W., ... Jander G. (2015)  
1247 The Tyrosine Aminomutase TAM1 Is Required for  $\beta$ -Tyrosine Biosynthesis in Rice.  
1248 *The Plant Cell* **27**, 1265–1278.

1249 Zheng W., Bergman B., Chen B., Zheng S., Xiang G. & Rasmussen U. (2009a) Cellular  
1250 responses in the cyanobacterial symbiont during its vertical transfer between plant  
1251 generations in the *Azolla* microphyllasymbiosis. *New Phytologist* **181**, 53–61.

1252 Zheng W., Rang L., Bergman B. (2009b) Structural Characteristics of the Cyanobacterium–  
1253 *Azolla* Symbioses. In: Pawlowski K. (eds) Prokaryotic Symbionts in Plants.  
1254 *Microbiology Monographs*, vol 8. Springer, Berlin, Heidelberg.

1255 Zwahlen J., Kolappan S., Zhou R., Kisker C. & Tonge P.J. (2007) Structure and Mechanism  
1256 of MbtI, the Salicylate Synthase from *Mycobacterium tuberculosis* <sup>†</sup>. *Biochemistry* **46**,  
1257 954–964.

1258

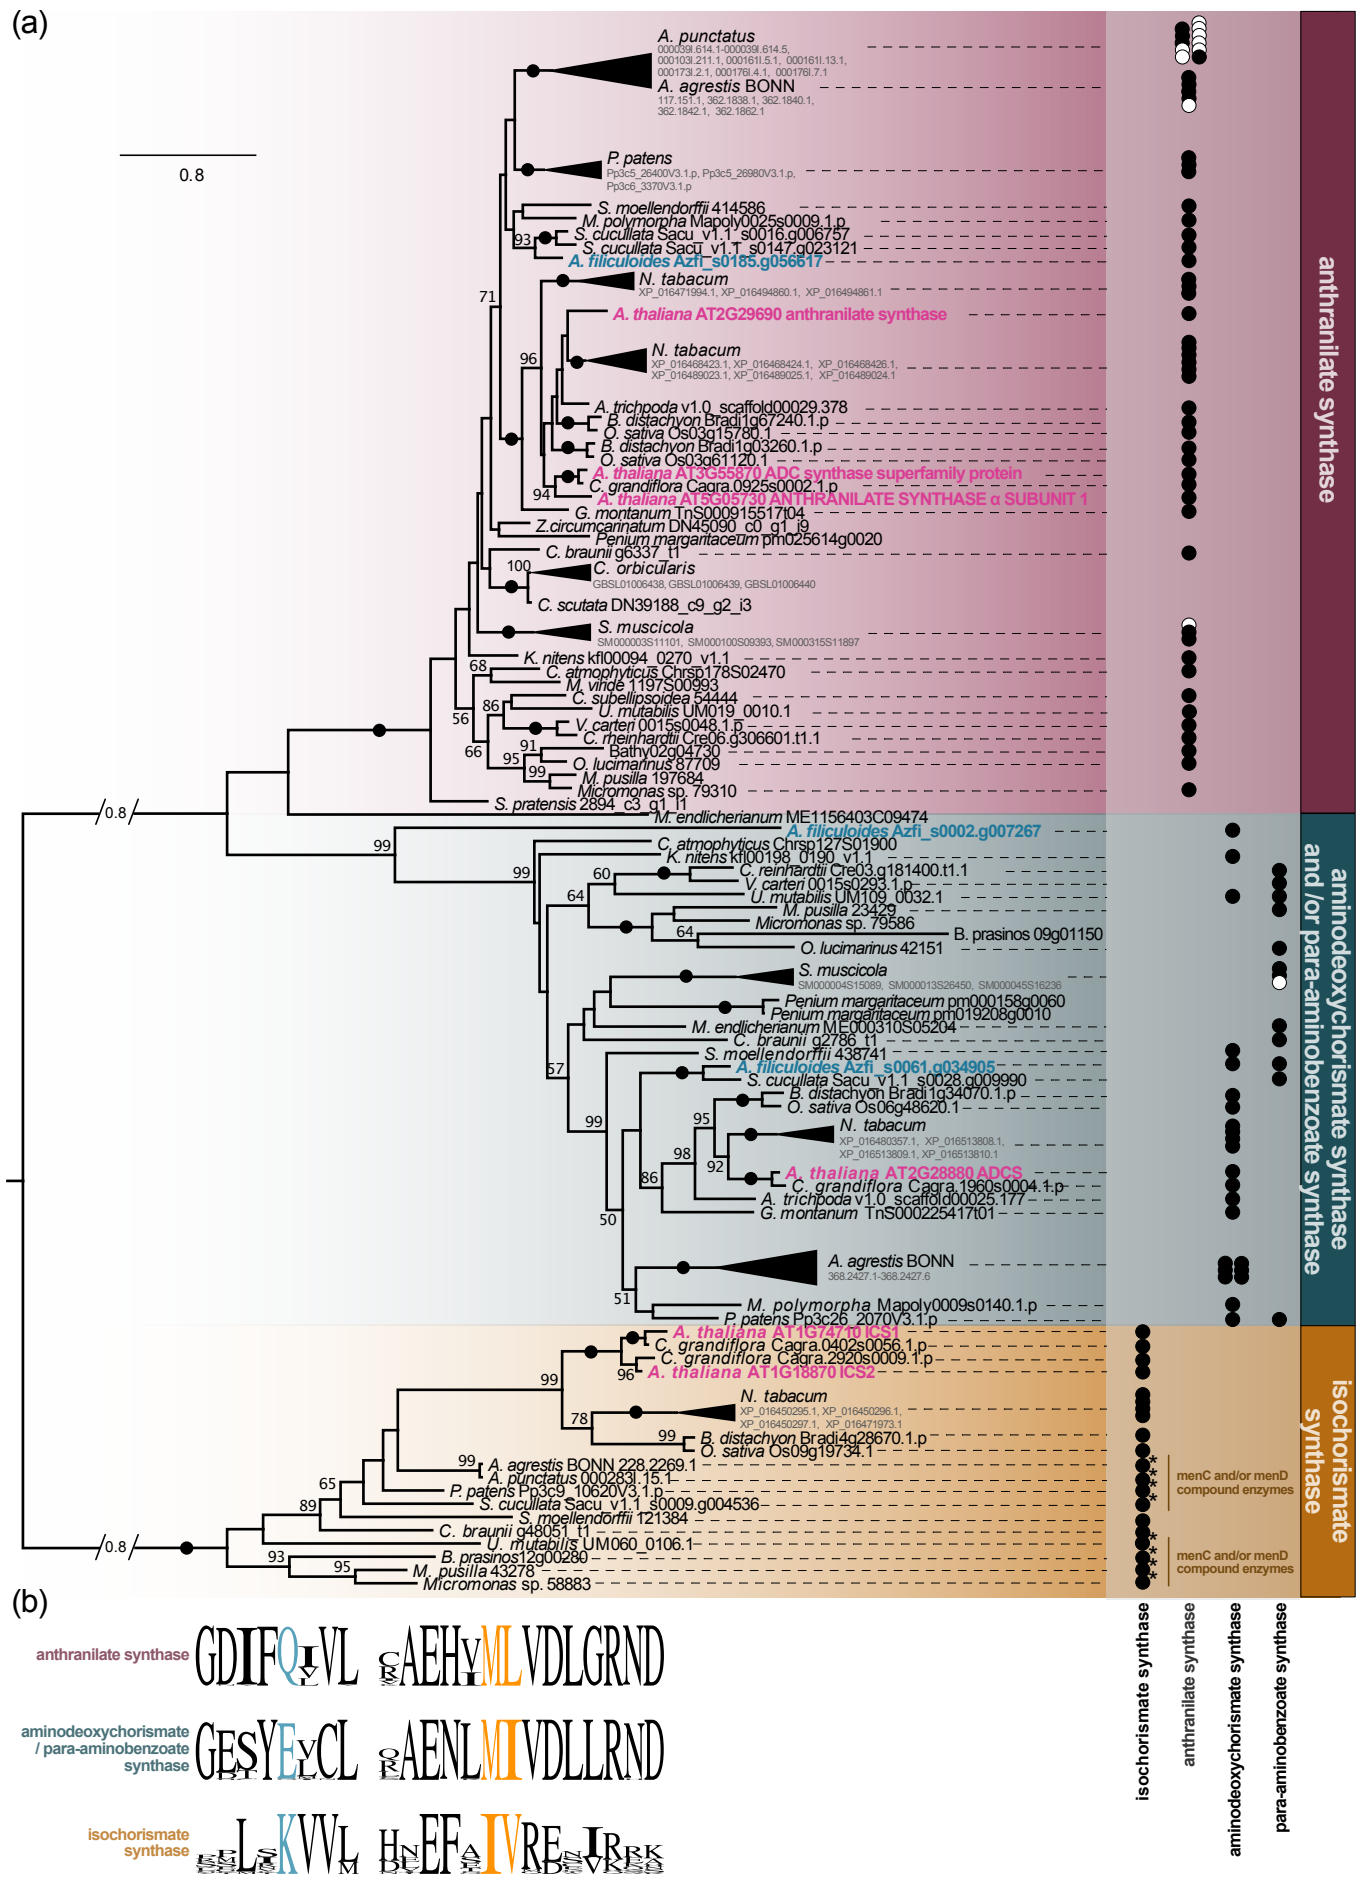

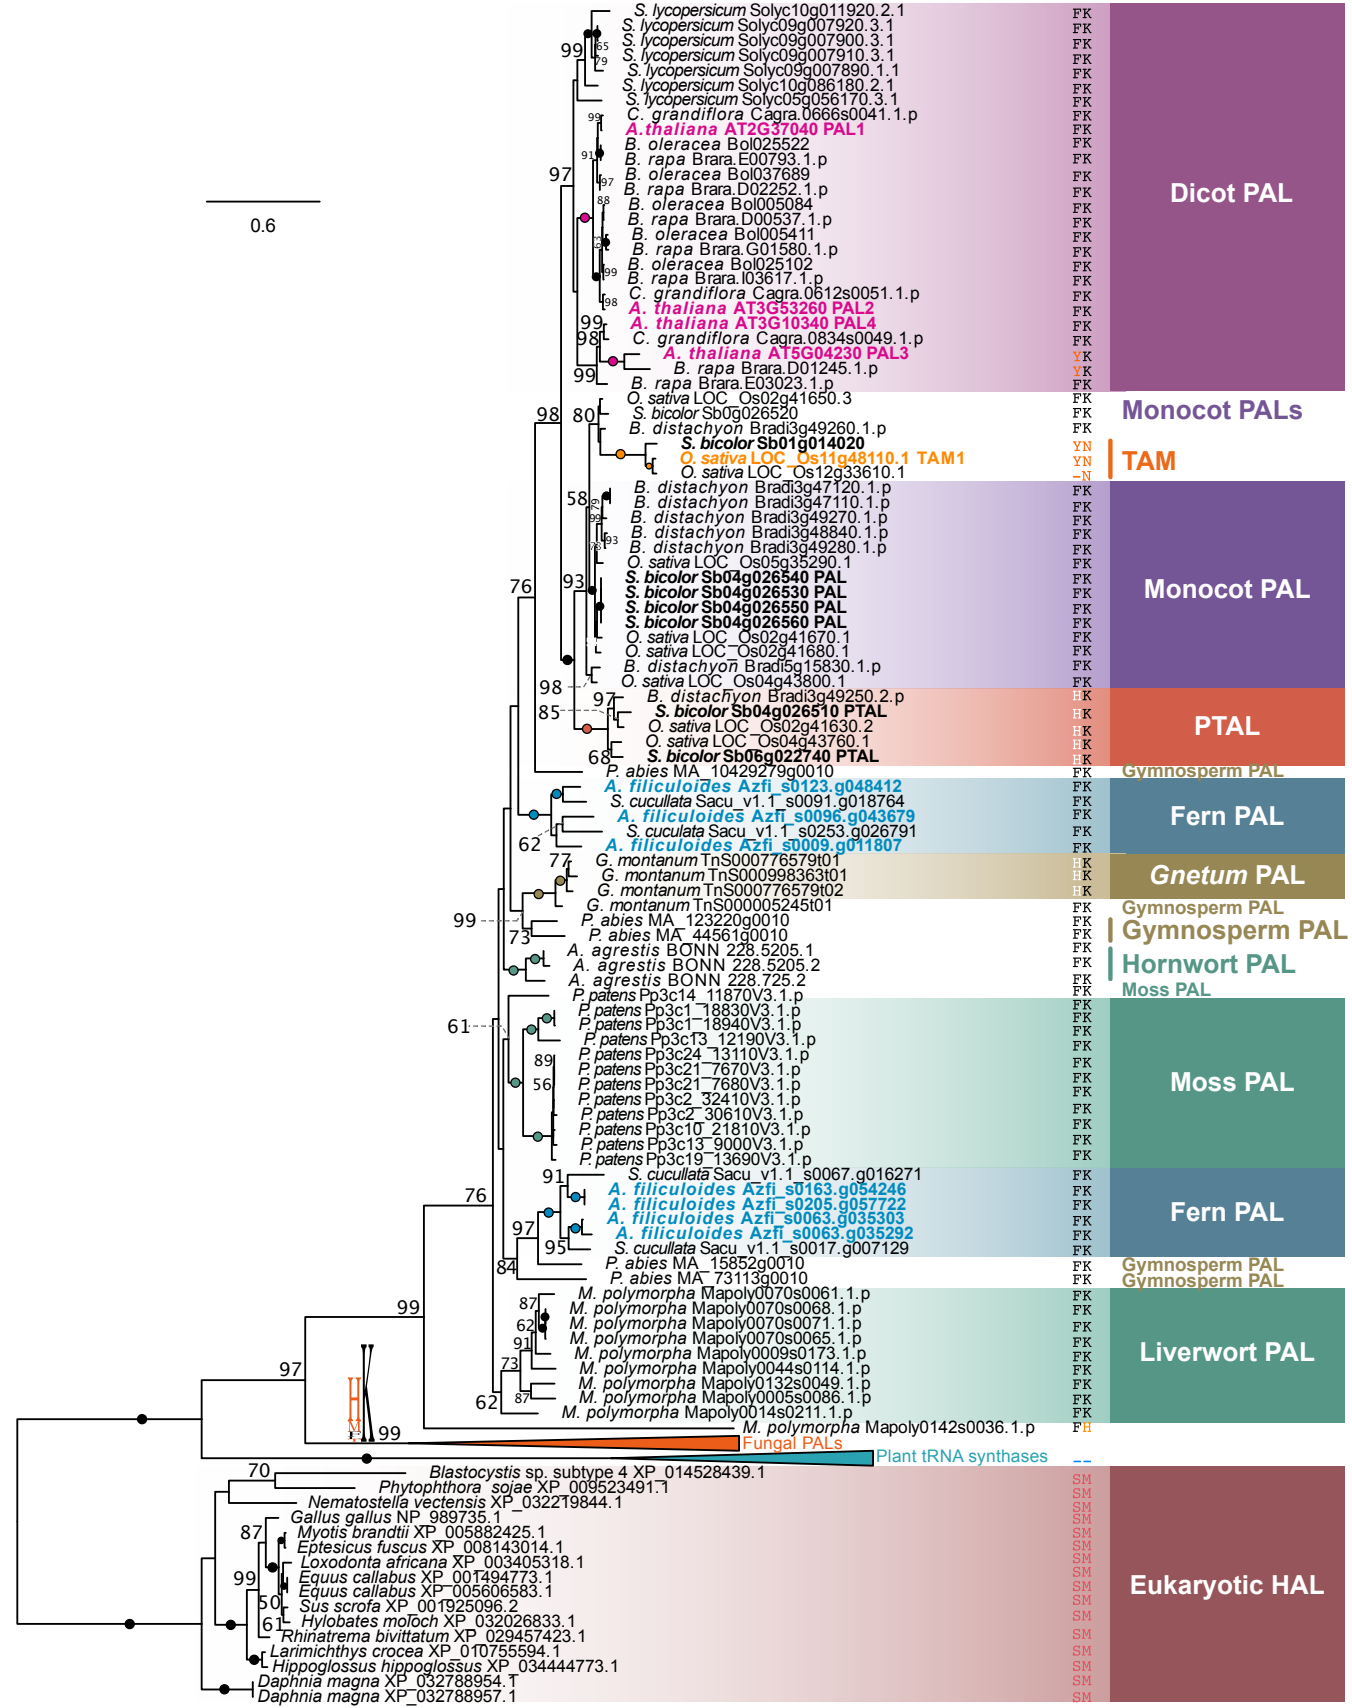



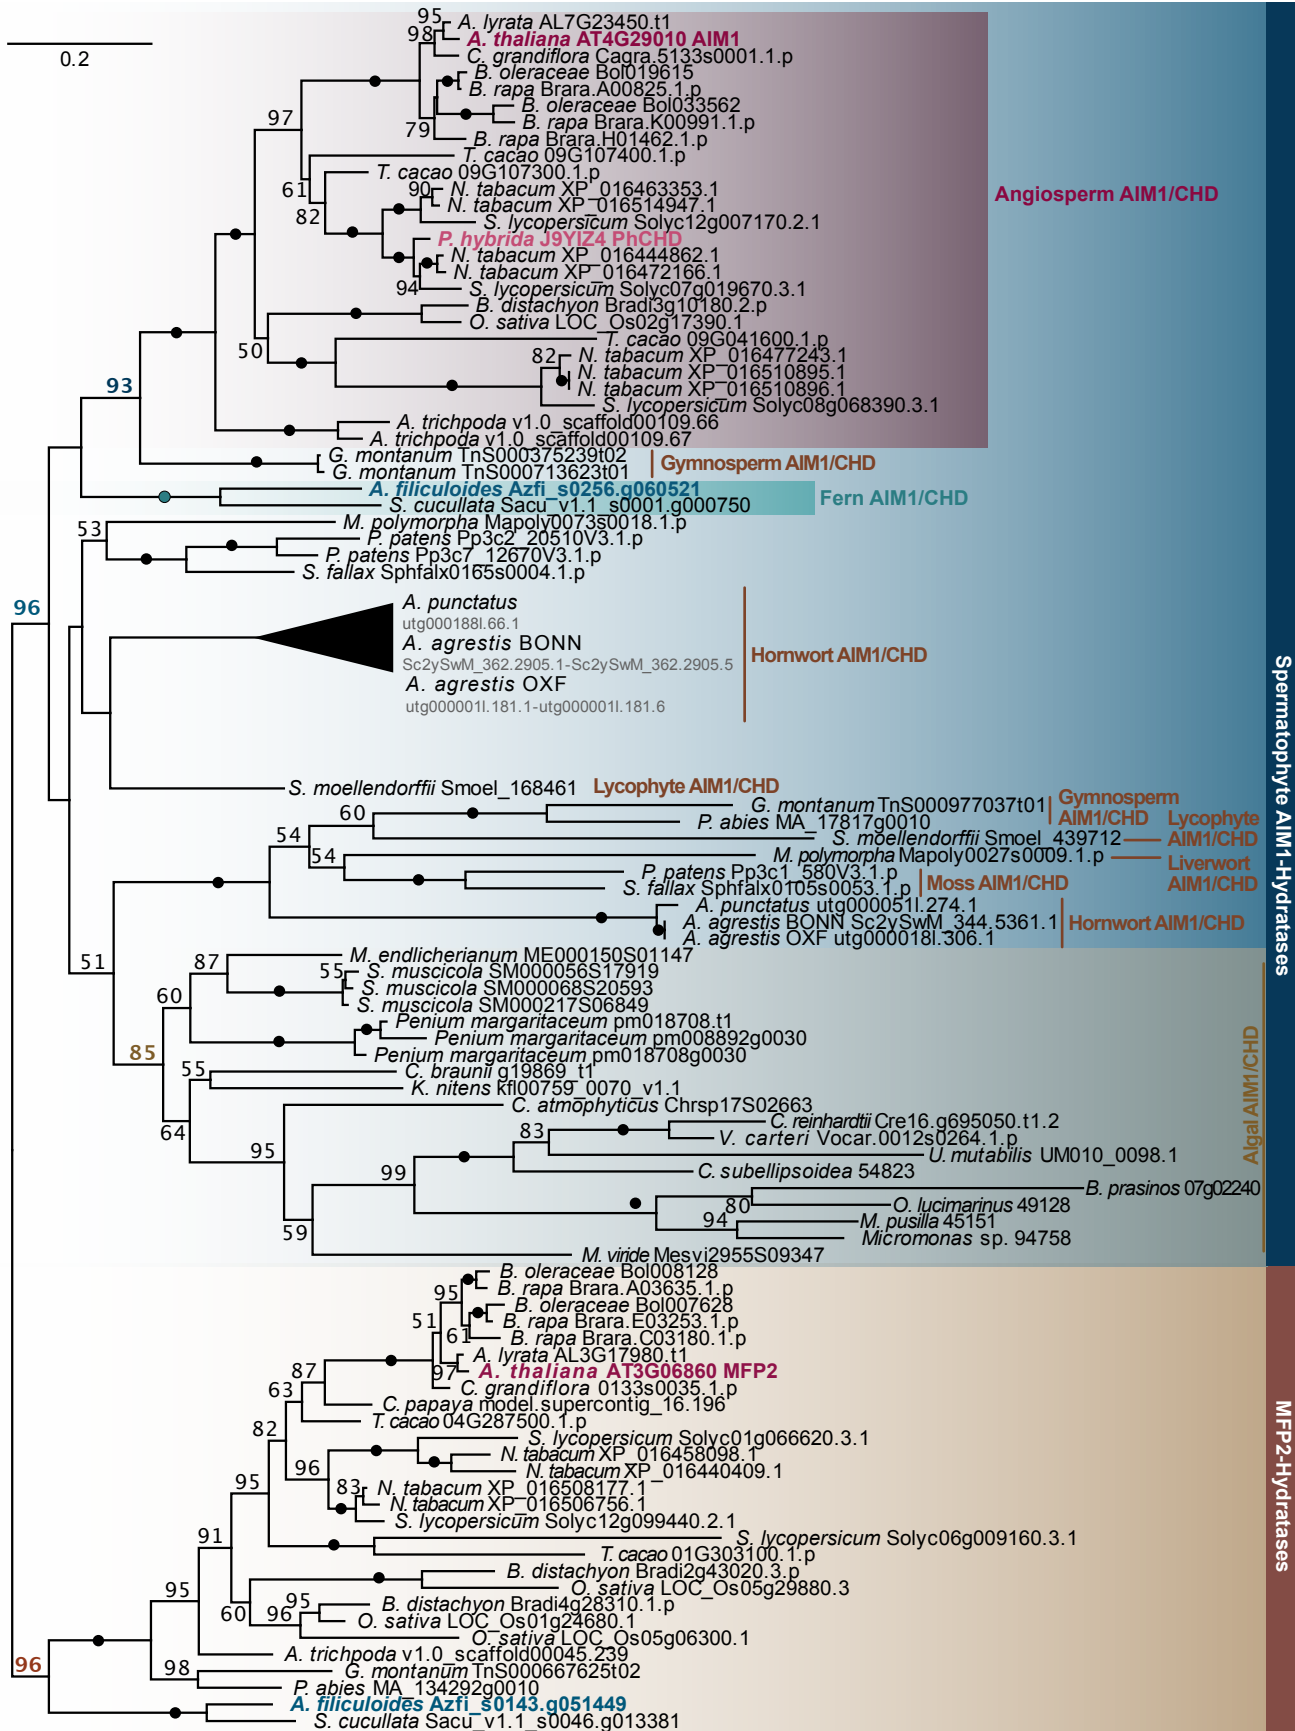



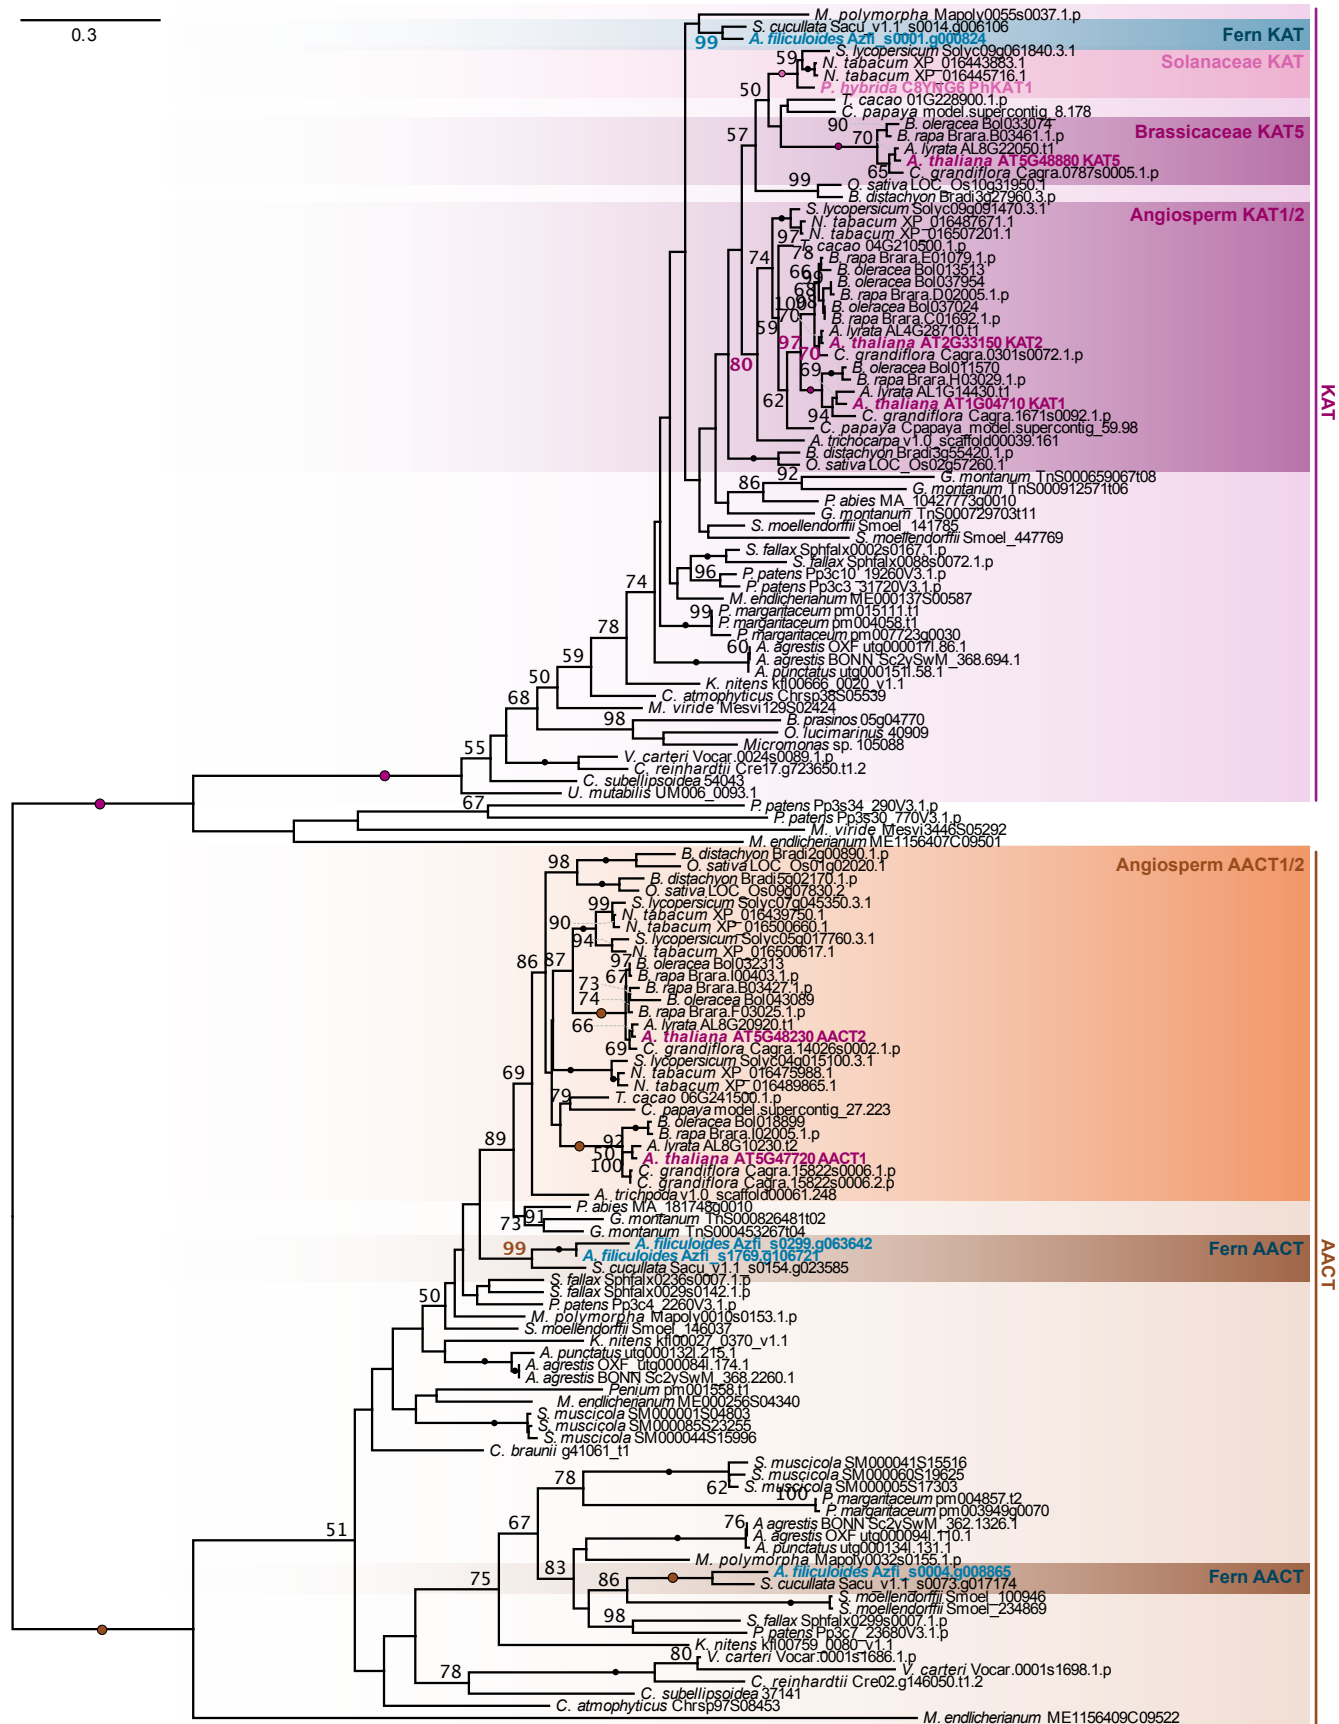

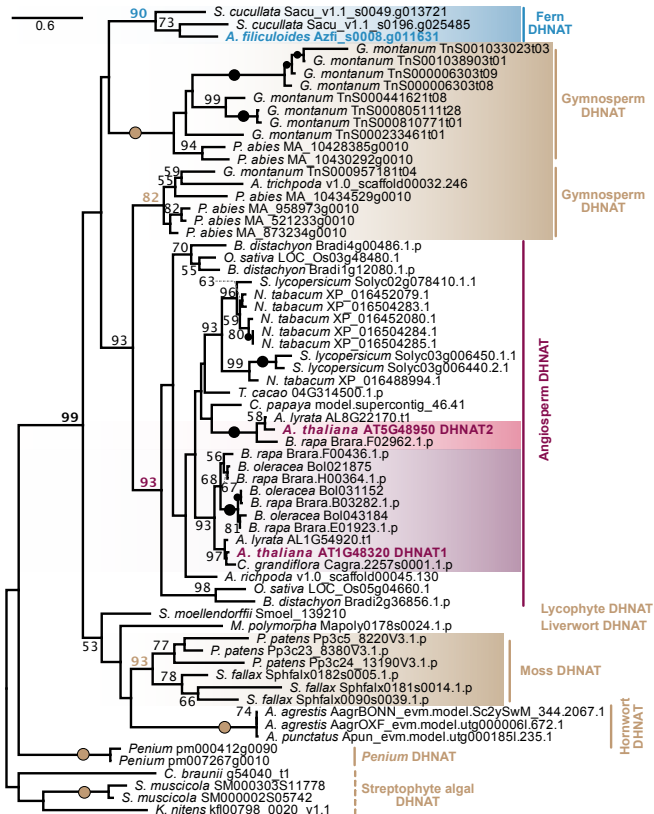

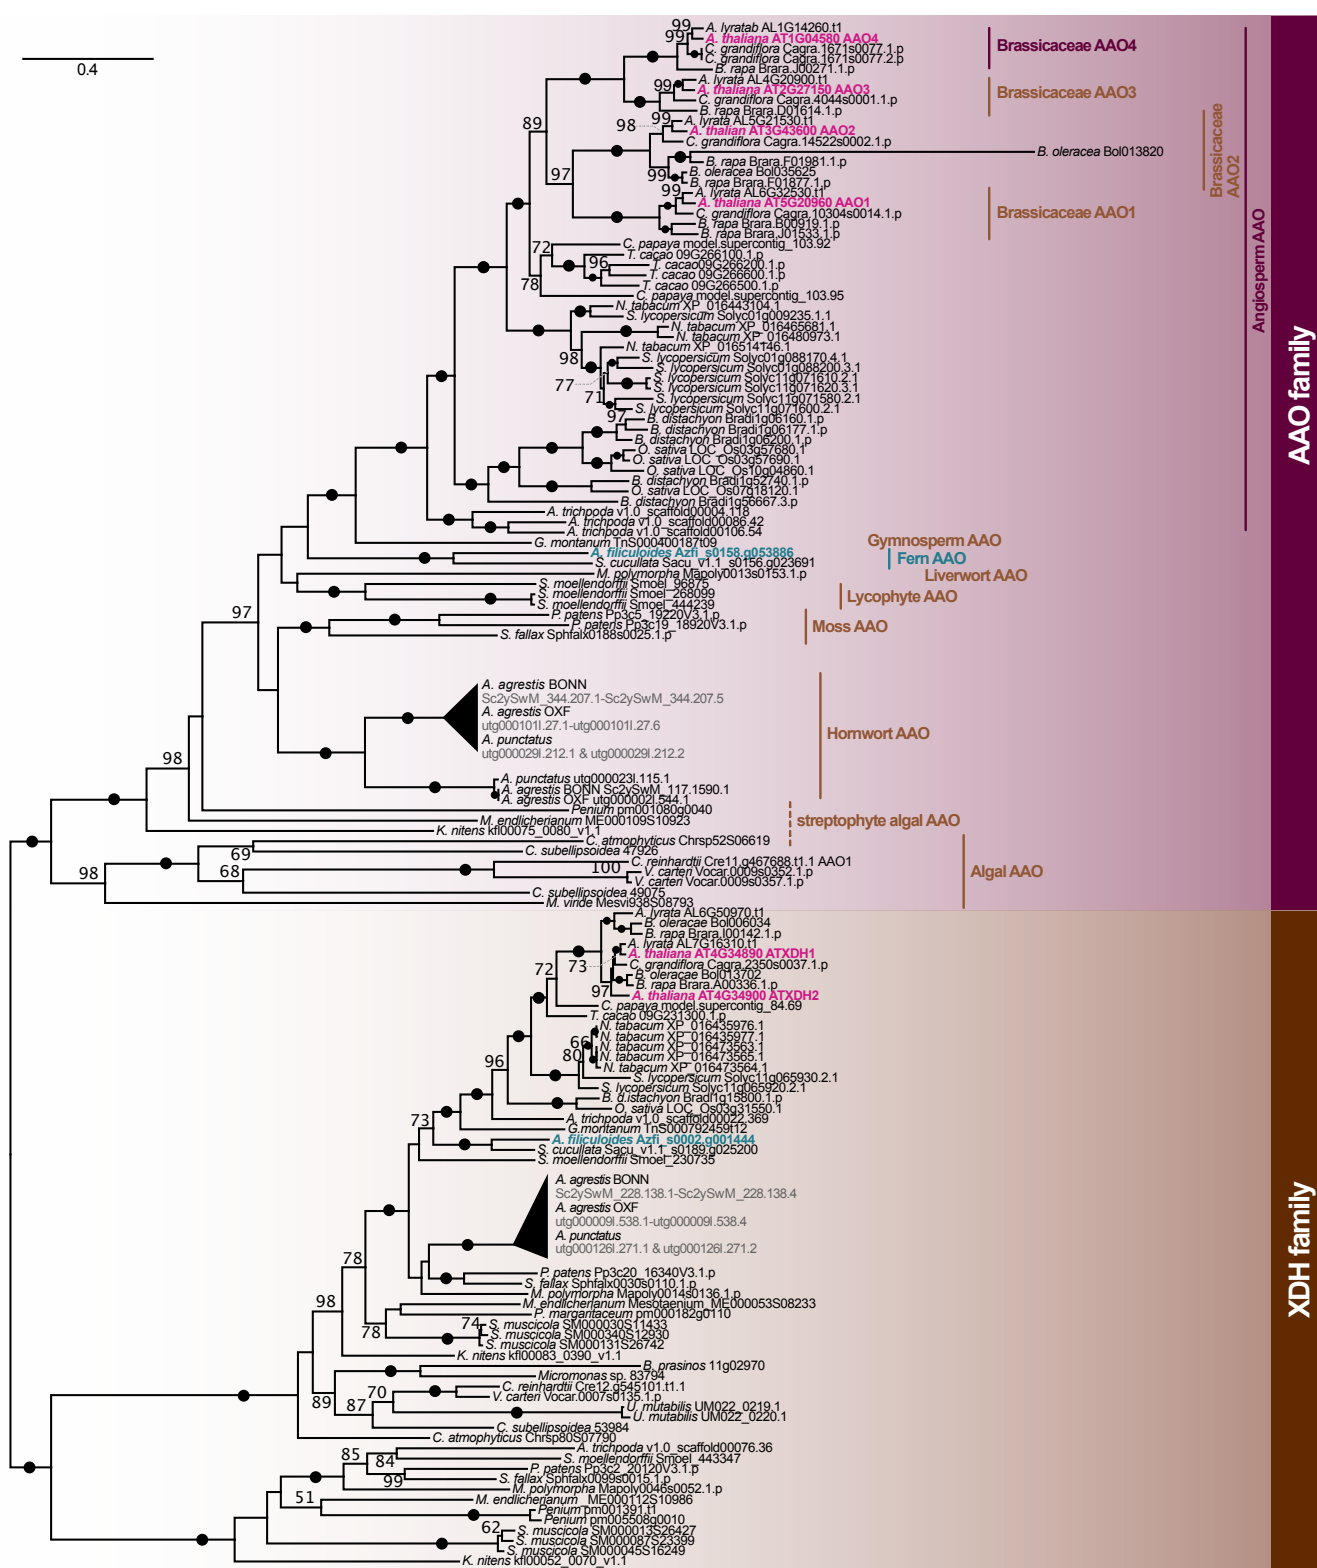

## CHLOROPLAST

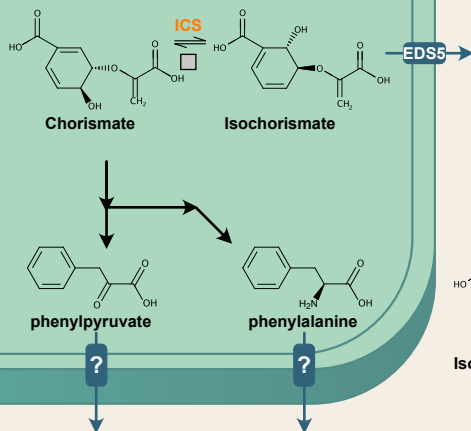

## CYTOSOL

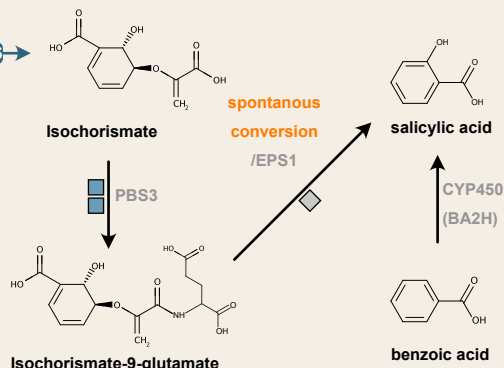

## MITOCHONDRION

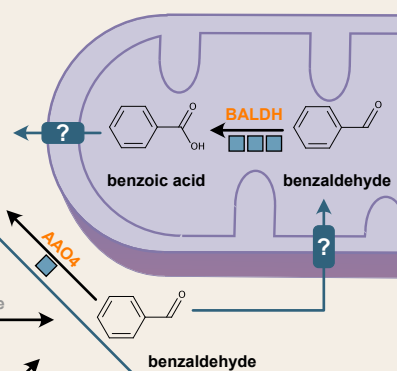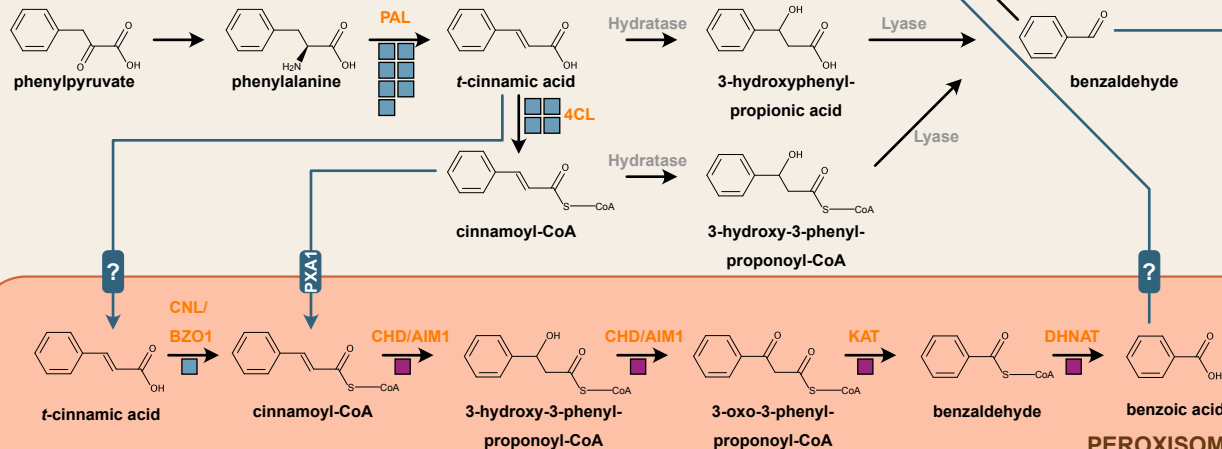

## PEROXISOME

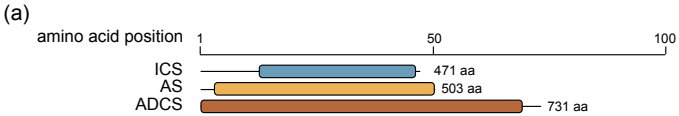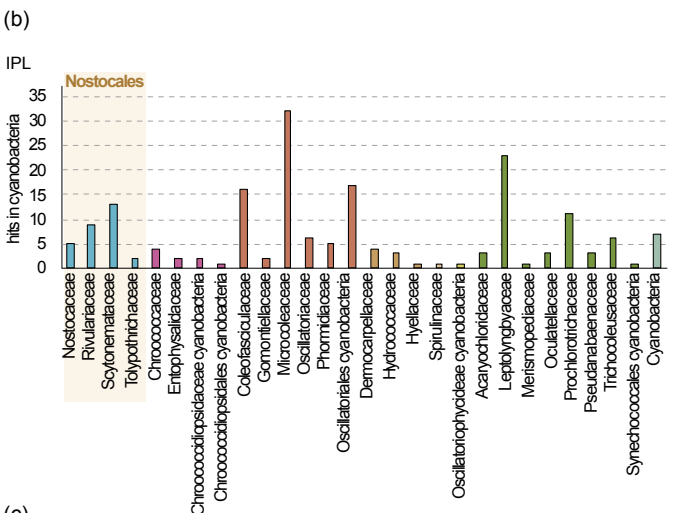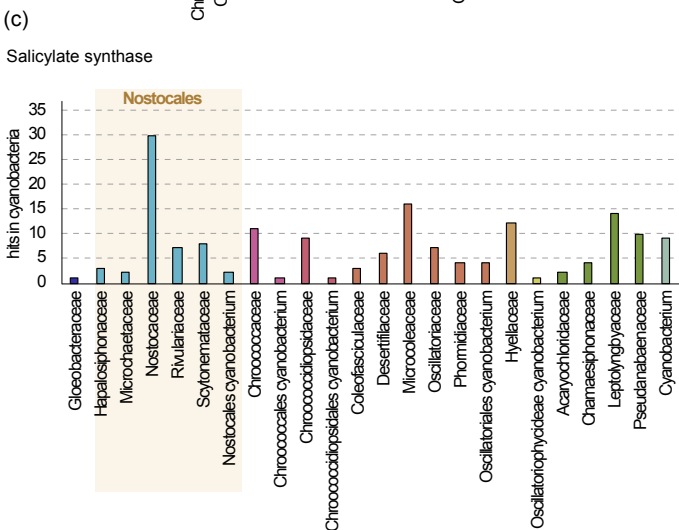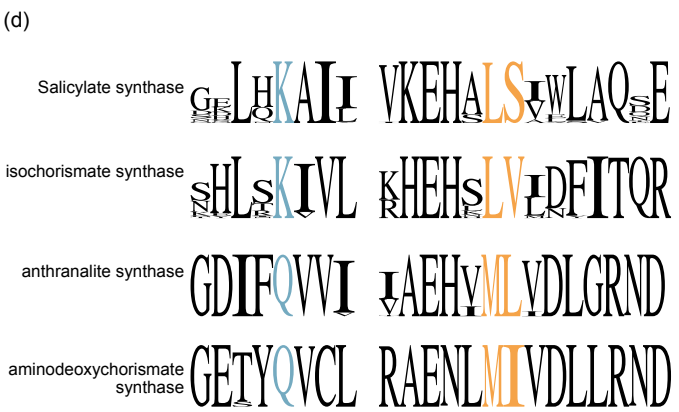

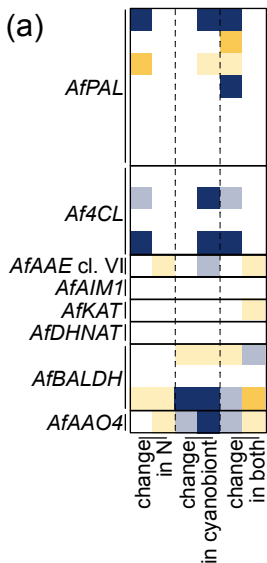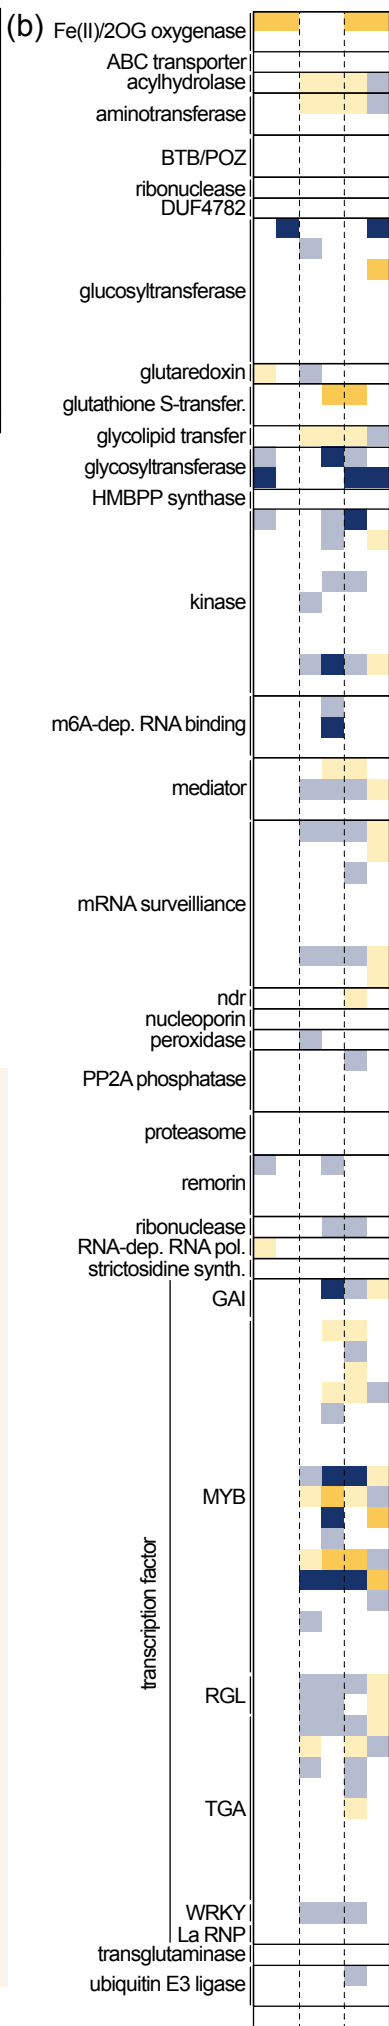

## KEY:

### Topology:

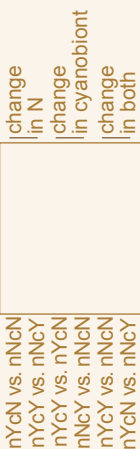

### Colours:

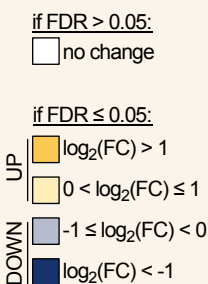

Source: https://biorxiv.org/content/10.1101/2021.03.12.435107v1.full.pdf
